# Supplementary material for: Tumor suppressor SMARCB1 suppresses super-enhancers to govern hESC lineage determination
Source: eLife journal article supplement (doi:10.7554/elife.45672), 2019-04-29
Supplement: supp [file elife-45672-supp-v1.zip]

Archive with 12 entries (12 files):
- elife_poa_e45672_Figure_5_figure_supplement_1.jpg
- elife_poa_e45672_Supplementary_File_5.xlsx
- elife_poa_e45672_Supplementary_File_3.xlsx
- elife_poa_e45672_Supplementary_File_6.xlsx
- elife_poa_e45672_Figure_4_figure_supplement_1.jpg
- elife_poa_e45672_Transparent_Reporting_File.pdf
- elife_poa_e45672_Figure_1_figure_supplement_1.jpg
- elife_poa_e45672_Supplementary_File_4.xlsx
- elife_poa_e45672_Figure_3_figure_supplement_1.jpg
- elife_poa_e45672_Figure_2_figure_supplement_1.jpg
- elife_poa_e45672_Supplementary_File_2.xlsx
- elife_poa_e45672_Supplementary_File_1.xlsx
