# Supplementary material for: Tumor suppressor SMARCB1 suppresses super-enhancers to govern hESC lineage determination
Source: eLife journal article supplement (doi:10.7554/elife.45672), 2019-04-29
Supplement: supp [file elife-45672-supp-v1.zip › elife_poa_e45672_Supplementary_File_1.xlsx]

## Sheet: shRNAs
Target, exon	shRNA clone #	shRNA sequence
SMARCB1, 3	367694 (Line 1)	ACCAGTGTGACCCTGTTAA
SMARCB1, 6	367696 (Line 2)	AGACAGCAGATCGAGTCCT
NTC, N/A	N/A	TCGCTTGGGCGAGAGTAAG

## Sheet: Most_affected_genes_SMARCB1_KD
Top upregulated genes					Top downregulated genes
Gene	q-values	Fold change			Gene	q-values	Fold change
FEZF1-AS1	4.41488e-05	27.3949			LINC00176	1.58411e-05	-7.85142
ZIC1	0.000618973	13.7207			EEF1A1P22	5.83852e-05	-7.45482
SOX21	1.88829e-05	13.2925			HMGN1P30	0.00555659	-6.82737
FEZF1	0.000327523	12.111			RPS10P3	2.15947e-06	-6.57277
FGF8	0.00113231	10.7137			NCLP1	0.000299697	-6.1018
SLC17A6	2.10568e-05	9.5266			RNU6-732P	5.82647e-05	-4.94899
LINC00461	0.000767568	8.57674			HSPD1P2	0.0131046	-4.0794
LINC01097	0.000107595	8.16702			RP1-40G4P.1	0.000322229	-3.97057
RP11-89K21.1	0.00105363	8.16632			MCHR1	0.000119585	-3.92594
SOX21-AS1	3.82945e-05	7.26914			FCRL5	9.99961e-05	-3.89888
PCDH8	1.8231e-05	7.13121			CD53	0.000689826	-3.85128
SIX6	6.03094e-05	6.88459			APLNR	0.0113571	-3.71801
HHEX	0.00205878	6.70927			CTC-398G3.2	0.00158496	-3.62134
SHISA3	3.05619e-06	6.46966			ABI3	0.00812902	-3.42097
MEOX2	0.00202494	6.32241			AZGP1P2	0.0301402	-3.4203

## Sheet: Degree_hESC_ChIPseq_intersect
Set_name	Overlap_with_all_peaks	Overlap_with_downreg_genes	Downreg_genes_overlap_pval	Overlap_with_upreg_genes	Upreg_genes_overlap_pval
H3k27me3StdPk	5751	33	0.337252	776	1.45092e-24
AwgTfbsBroadH1hescEzh239875UniPk	873	5	0.347823	152	4.73908e-12
Rad21V0416102UniPk	6413	34	0.56015	739	1.58391e-06
Ctbp2UcdUniPk	2424	13	0.465414	304	1.47515e-05
Suz12UcdUniPk	288	3	0.0743942	49	0.000102645
Ctcfsc5916V0416102UniPk	5396	26	0.756034	600	0.00174591
AwgTfbsBroadH1hescCtcfUniPk	6167	31	0.693831	666	0.0138243
GSM1701825_ESC_SOX2	2153	10	0.64909	246	0.0158259
Bcl11aPcr1xUniPk	178	2	0.0749489	26	0.0214246
Nanogsc33759V0416102UniPk	752	5	0.232643	92	0.0238506
H3k09me3StdPk	2035	14	0.145765	228	0.040906
Tcf12Pcr1xUniPk	1618	7	0.675413	179	0.0886297
CtcfStdPk	9343	42	0.965397	966	0.15082
Suz12051317Pk	9174	43	0.92233	946	0.187685
Plu1Pk	6300	33	0.591906	653	0.206855
hESC_Ring1B_ChIP_GSE58099	1573	8	0.501505	167	0.233839
RxraV0416102UniPk	354	0	0.860765	36	0.44452
Pou5f1sc9081V0416102UniPk	356	1	0.585723	36	0.458834
Hdac2sc6296V0416102UniPk	2029	10	0.567281	206	0.463568
Fosl1sc183V0416102UniPk	620	2	0.667538	60	0.61523
Rfx5200401194IggrabUniPk	553	0	0.954859	51	0.736539
H2azStdPk	14603	84	0.118825	1463	0.845864
CjunIggrabUniPk	615	2	0.662137	50	0.948553
H3k4me1StdPk	13722	66	0.98439	1357	0.973447
Hdac6a301341aPk	7516	38	0.718863	719	0.982367
Chd7a301223a1Pk	12019	53	0.996617	1176	0.985318
CmycUniPk	187	0	0.645286	10	0.985679
BRG1_aligned_minus_input_hg19_10bp_merge_counts_strong	16031	85	0.83835	1594	0.994806
Znf143IggrabUniPk	6148	24	0.978914	560	0.999475
Tead4sc101184V0422111UniPk	3321	18	0.464215	285	0.999513
CebpbIggrabUniPk	2180	9	0.774441	177	0.999613
MafkIggrabUniPk	929	6	0.249545	64	0.999729
MaxUcdUniPk	4127	7	0.999976	359	0.999762
NrsfV0416102UniPk	2107	13	0.265291	167	0.999858
Rbbp5a300109aStdPk	14849	70	0.998505	1447	0.99994
Bach1sc14700IggrabUniPk	4046	14	0.974171	342	0.999976
Egr1V0416102UniPk	4703	20	0.893714	403	0.999985
P300kat3bPk	11272	53	0.96352	1057	0.999993
Usf1Pcr1xUniPk	5351	20	0.97888	457	0.999998
P300V0416102UniPk	3287	11	0.963002	260	0.999999
JundV0416102UniPk	3665	14	0.926379	294	0.999999
Six5Pcr1xUniPk	2221	0	0.999998	161	1
JundIggrabUniPk	2645	13	0.60508	198	1
H3k4me2StdPk	14356	65	0.999589	1374	1
AwgTfbsBroadH1hescRbbp5a300109aUniPk	8453	26	0.999985	750	1
Hdac2a300705aPk	14093	64	0.999221	1339	1
H3k4me3StdPk	13774	54	1	1302	1
Usf2IggrabUniPk	2799	7	0.990982	204	1
Jarid1aab26049StdPk	12741	66	0.794689	1183	1
Sirt6Pk	8403	39	0.915261	728	1
Atf3V0416102UniPk	2623	4	0.999331	181	1
Sp2V0422111UniPk	2004	5	0.970717	127	1
Chd1a301218aIggrabUniPk	1631	3	0.982628	96	1
SrfPcr1xUniPk	2046	8	0.806692	128	1
Sp4v20V0422111UniPk	4020	8	0.999858	299	1
H3k9acStdPk	13682	58	0.999949	1273	1
Nrf1IggrabUniPk	3759	5	0.999991	275	1
Sp1Pcr1xUniPk	5936	15	0.999957	475	1
Chd1a301218aStdPk	14220	64	0.999611	1330	1
Sap3039731Pk	12713	44	1	1161	1
Phf8a301772aPk	13456	48	1	1242	1
Jmjd2aa300861a1Pk	13774	51	1	1276	1
Sin3ak20Pcr1xUniPk	5294	12	0.999965	409	1
Mxi1IggrabUniPk	3947	1	1	283	1
CmycIggrabUniPk	2833	0	1	183	1
Brca1IggrabUniPk	1567	2	0.993516	78	1
Atf2sc81188V0422111UniPk	2463	8	0.937682	138	1
Gtf2f1IggrabUniPk	2925	7	0.99447	153	1
AwgTfbsBroadH1hescJarid1aab26049UniPk	1710	1	0.999436	65	1
H3k36me3StdPk	6681	21	0.999551	463	1
Chd2IggrabUniPk	4541	11	0.999633	302	1
H4k20me1StdPk	10250	39	0.99974	844	1
GabpPcr1xUniPk	3222	5	0.999858	198	1
AwgTfbsBroadH1hescChd1a301218aUniPk	4130	8	0.999916	269	1
H3k27acStdPk	11853	44	0.999994	987	1
Taf7sc101167V0416102UniPk	6850	16	0.999999	468	1
Sin3anb6001263IggrabUniPk	9504	28	1	795	1
TbpIggrabUniPk	9667	27	1	741	1
Taf1V0416102UniPk	11106	33	1	908	1
Pol2V0416102UniPk	9838	25	1	732	1
Yy1sc281V0416102UniPk	6420	9	1	495	1
Pol2UniPk	8223	15	1	544	1
Pol24h8V0416102UniPk	8852	17	1	615	1
H3k79me2StdPk	10103	20	1	704	1
