# Supplementary material for: Tumor suppressor SMARCB1 suppresses super-enhancers to govern hESC lineage determination
Source: eLife journal article supplement (doi:10.7554/elife.45672), 2019-04-29
Supplement: supp [file elife-45672-supp-v1.zip › elife_poa_e45672_Supplementary_File_2.xlsx]

## Sheet: TF_ChIPseq_SMARCB1_KD
Set_name	Overlap_with_all_peaks	Overlap_with_weakened_peaks		Weakened_peak_overlap_pval	Overlap_with_strengthened_peaks		Strengthened_peak_overlap_pval
Rad21IggrabUniPk	44544	145	0.0346393	1	1582	0.506889	7.35963e-174
Ctcfsc5916V0416102UniPk	45860	116	0.0277114	1	1569	0.502723	2.32485e-155
AwgTfbsBroadH1hescCtcfUniPk	52981	195	0.0465839	1	1707	0.54694	6.59095e-149
Rad21V0416102UniPk	56073	405	0.0967511	1	1707	0.54694	1.28998e-123
CtcfStdPk	69862	642	0.153368	1	1862	0.596604	4.1001e-83
Znf143IggrabUniPk	26262	194	0.046345	1	654	0.209548	1.22663e-13
BRG1_aligned_minus_input_hg19_10bp_merge_counts _strong	117999	3711	0.886527	2.59018e-154	2418	0.774752	1.37099e-12
GSM1701825_ESC_SOX2	15247	961	0.229575	1.83941e-156	369	0.118231	1.05241e-06
Bcl11aPcr1xUniPk	2324	44	0.0105112	0.979307	74	0.0237103	1.12809e-05
Nanogsc33759V0416102UniPk	5032	145	0.0346393	0.0648016	136	0.0435758	2.85713e-05
Pou5f1sc9081V0416102UniPk	3443	166	0.039656	7.99532e-15	70	0.0224287	0.26495
Tead4sc101184V0422111UniPk	16938	688	0.164357	8.15011e-35	326	0.104454	0.409552
iPSC12_no_D27_NSC	7926	420	0.100334	4.10603e-45	153	0.0490227	0.413276
CebpbIggrabUniPk	7231	212	0.050645	0.0189963	134	0.042935	0.609431
MafkIggrabUniPk	4343	185	0.0441949	1.32585e-11	79	0.0253124	0.637487
CmycUniPk	351	5	0.00119446	0.885937	3	0.00096123	0.902918
Chd7a301223a1Pk	71066	1822	0.43526	0.422488	1318	0.422301	0.90374
Chd1a301218aIggrabUniPk	1867	5	0.00119446	1	27	0.00865107	0.919704
Rfx5200401194IggrabUniPk	1277	24	0.0057334	0.93119	17	0.00544697	0.925449
CtcfUniPk	37056	121	0.0289059	1	670	0.214675	0.938767
Brca1IggrabUniPk	1912	2	0.000477783	1	21	0.00672861	0.996404
Atf2sc81188V0422111UniPk	5445	148	0.0353559	0.2062	76	0.0243512	0.997887
P300V0416102UniPk	8302	283	0.0676063	5.61573e-07	116	0.0371676	0.999829
CjunIggrabUniPk	2031	147	0.0351171	3.68356e-29	18	0.00576738	0.999862
Hdac2sc6296V0416102UniPk	5408	176	0.0420449	0.000606384	66	0.0211471	0.999957
Tcf12Pcr1xUniPk	7160	395	0.0943622	2.10479e-46	90	0.0288369	0.999991
AwgTfbsBroadH1hescJarid1aab26049UniPk	1503	0	0	1	8	0.00256328	0.999996
Atf3V0416102UniPk	4484	65	0.015528	1	47	0.0150593	0.999997
RxraV0416102UniPk	1188	62	0.0148113	8.33691e-08	4	0.00128164	0.999998
Six5Pcr1xUniPk	3112	42	0.0100334	0.999998	26	0.00833066	0.999999
Fosl1sc183V0416102UniPk	932	15	0.00358337	0.965024	1	0.00032041	1
AwgTfbsBroadH1hescChd1a301218aUniPk	5408	15	0.00358337	1	56	0.017943	1
SrfPcr1xUniPk	3487	73	0.0174391	0.95805	29	0.00929189	1
Yy1sc281V0416102UniPk	15469	293	0.0699952	1	212	0.0679269	1
Chd1a301218aStdPk	79950	2274	0.543239	2.23994e-13	1374	0.440244	1
Sp1Pcr1xUniPk	13551	390	0.0931677	0.00671259	169	0.0541493	1
Usf2IggrabUniPk	6147	142	0.0339226	0.886719	56	0.017943	1
Suz12UcdUniPk	1834	3	0.000716675	1	4	0.00128164	1
Pol2V0416102UniPk	13567	121	0.0289059	1	159	0.0509452	1
Pol24h8V0416102UniPk	13375	158	0.0377449	1	152	0.0487023	1
CmycIggrabUniPk	4235	36	0.0086001	1	25	0.00801025	1
Sp2V0422111UniPk	2286	7	0.00167224	1	5	0.00160205	1
Usf1Pcr1xUniPk	15660	423	0.101051	0.108449	183	0.0586351	1
Gtf2f1IggrabUniPk	3304	11	0.00262781	1	13	0.00416533	1
AwgTfbsBroadH1hescEzh239875UniPk	3317	1	0.000238892	1	13	0.00416533	1
MaxUcdUniPk	9990	257	0.0613951	0.439992	95	0.030439	1
Sirt6Pk	52770	1432	0.342093	0.00259659	804	0.25761	1
Pol2UniPk	9811	41	0.00979455	1	91	0.0291573	1
Rbbp5a300109aStdPk	89334	2880	0.688008	1.84776e-81	1011	0.323935	1
Rbbp5a300109aStdPk_no_hESC_enhancers	76926	2126	0.507883	2.49e-07	836	0.267863	1
JundIggrabUniPk	8197	399	0.0953177	8.7527e-35	66	0.0211471	1
JundV0416102UniPk	7504	334	0.0797898	9.58574e-23	43	0.0137776	1
Hdac2a300705aPk	67189	2002	0.478261	9.25945e-20	770	0.246716	1
Ezh239875Pk	69018	1915	0.457477	8.37731e-07	925	0.296379	1
P300kat3bPk	58872	1644	0.392738	2.86565e-06	661	0.211791	1
Ctbp2UcdUniPk	6171	213	0.0508839	6.02284e-06	22	0.00704902	1
Jarid1aab26049StdPk	56231	1567	0.374343	9.73107e-06	693	0.222044	1
NrsfV0416102UniPk	5955	199	0.0475394	7.30012e-05	17	0.00544697	1
Plu1Pk	44585	1206	0.288103	0.00951256	615	0.197052	1
Hdac6a301341aPk	50732	1339	0.319876	0.0735898	743	0.238065	1
Sap3039731Pk	36823	946	0.225991	0.419051	388	0.124319	1
Sin3ak20Pcr1xUniPk	7875	196	0.0468227	0.633082	34	0.0108939	1
Bach1sc14700IggrabUniPk	8395	207	0.0494505	0.689301	63	0.0201858	1
Sin3anb6001263IggrabUniPk	17153	417	0.0996178	0.857651	73	0.0233899	1
Suz12051317Pk	49970	1223	0.292164	0.966332	693	0.222044	1
Mxi1IggrabUniPk	5909	99	0.0236503	0.999998	13	0.00416533	1
H4k20me1StdPk	54942	1238	0.295748	1	816	0.261455	1
Egr1V0416102UniPk	7761	106	0.0253225	1	31	0.00993271	1
Jmjd2aa300861a1Pk	37411	755	0.180363	1	324	0.103813	1
Chd2IggrabUniPk	6395	55	0.013139	1	43	0.0137776	1
GabpPcr1xUniPk	5377	34	0.00812231	1	10	0.0032041	1
Nrf1IggrabUniPk	4215	6	0.00143335	1	7	0.00224287	1
Phf8a301772aPk	38763	763	0.182274	1	327	0.104774	1
Sp4v20V0422111UniPk	5198	33	0.00788342	1	19	0.00608779	1
Taf1V0416102UniPk	14866	164	0.0391782	1	77	0.0246716	1
Taf7sc101167V0416102UniPk	8616	56	0.0133779	1	62	0.0198654	1
TbpIggrabUniPk	14078	186	0.0444338	1	59	0.0189042	1

## Sheet: Enhancer_sets_SMARCB1_KD
Set_name	Overlap_with_all_regions	Overlap_with_LA_regions	LA_overlap_pval	Overlap_with_HA_regions	HA_peak_overlap_pval	# Enhancers in set intersected by HA regions	# Enhancers intersecting >1 HA regions
H1_superenhancers	2541	39	0.999717	165	4.56598e-42	127	34
Adipose_Tissue_superenhancers	192	5	0.367527	4	0.304142	4	0
CD34_fetal_superenhancers	295	7	0.482259	4	0.663663	4	0
Class_I_active_Rada_Iglesias	4989	578	8.72441e-208	89	0.717442	91	1
Class_II_inactive_Rada_Iglesias	2185	141	2.73265e-23	37	0.73809	37	0
NCI-H69_superenhancers	665	25	0.0233806	9	0.814535	8	1
GLC16_superenhancers	496	8	0.887996	6	0.834307	5	1
CD34_Primary_RO01480_superenhancers	1342	26	0.916403	19	0.891855	18	1
HCC1954_superenhancers	2259	87	9.15657e-05	30	0.97848	28	2
CD34_adult_superenhancers	630	17	0.348915	5	0.980733	5	0
MM1S_superenhancers	2041	77	0.000385679	26	0.982679	24	2
HepG2_superenhancers	1150	25	0.763074	12	0.98522	11	1
Astrocytes_superenhancers	2954	127	1.03868e-08	39	0.991426	35	4
CD8_Naive_7pool_superenhancers	1431	34	0.627673	14	0.996368	14	0
RPMI-8402_superenhancers	1219	51	0.000311402	11	0.996444	11	0
CD34_Primary_RO01549_superenhancers	1180	30	0.463368	10	0.997572	9	1
MCF-7_superenhancers	634	12	0.823946	3	0.998017	3	0
CD4_Memory_Primary_8pool_superenhancers	1448	41	0.222786	13	0.998561	13	0
NCI-H82_superenhancers	340	14	0.030285	0	0.998568	0	0
HSMM_superenhancers	3166	135	6.13514e-09	37	0.999297	34	3
GM12878_superenhancers	1373	54	0.000922336	11	0.999376	11	0
u87_superenhancers	5139	200	3.33838e-09	66	0.999703	58	8
CD34_Primary_RO01536_superenhancers	3604	104	0.094892	42	0.99971	39	3
CD4_Naive_Primary_8pool_superenhancers	1899	46	0.609071	17	0.99974	16	1
CD56_superenhancers	3686	121	0.00273563	43	0.999746	39	4
IMR90_superenhancers	2196	93	1.45767e-06	21	0.99976	19	2
CD3_superenhancers	2715	83	0.0448922	28	0.999817	25	3
Osteoblasts_superenhancers	7140	277	4.89034e-12	97	0.999823	84	12
DND41_superenhancers	2447	91	0.000213741	24	0.999836	23	1
CD8_Naive_8pool_superenhancers	1574	38	0.600349	12	0.999857	12	0
NHEK_superenhancers	3692	102	0.194114	42	0.999859	39	3
Skeletal_Muscle_Myoblast_superenhancers	2610	116	7.22598e-09	26	0.999868	23	3
Jurkat_superenhancers	2057	81	7.45613e-05	18	0.999896	16	2
CD4_Naive_Primary_7pool_superenhancers	1623	38	0.67435	12	0.999921	12	0
Ly3_superenhancers	3613	93	0.444622	39	0.999951	38	1
CD8_primiary_superenhancers	4035	127	0.00836871	45	0.999958	40	4
HMEC_superenhancers	4331	159	3.48368e-06	49	0.999967	44	5
VACO_9m_superenhancers	1631	70	1.53339e-05	11	0.999974	11	0
Panc1_superenhancers	3493	115	0.00307767	36	0.999978	30	6
CD8_Memory_7pool_superenhancers	2937	81	0.221545	28	0.999979	26	2
HBL1_superenhancers	2753	86	0.0275737	25	0.999985	25	0
HCT-116_superenhancers	2773	91	0.00782227	25	0.999988	22	3
HUVEC_superenhancers	4386	152	9.29102e-05	48	0.999988	39	8
Ly4_superenhancers	3447	126	3.78865e-05	33	0.999996	32	1
VACO_503_superenhancers	3205	85	0.337391	29	0.999997	27	2
Bladder_superenhancers	1670	65	0.000439712	9	0.999999	9	0
Ly1_superenhancers	3561	118	0.00225239	33	0.999999	32	1
CD4p_CD25-_CD45ROp_Memory_superenhancers	2742	92	0.00426881	22	0.999999	21	1
DHL6_superenhancers	2854	80	0.181981	23	0.999999	21	2
K562_superenhancers	3032	85	0.175461	25	0.999999	20	2
CD4p_CD25-_CD45RAp_Naive_superenhancers	2998	85	0.150112	24	1	23	1
CD19_Primary_superenhancers	2925	82	0.179175	23	1	23	0
Brain_Hippocampus_Middle_150_superenhancers	7448	237	0.000301715	88	1	85	3
CD4p_CD225int_CD127p_Tmem_superenhancers	1874	54	0.165	10	1	10	0
CD4p_CD25-_Il17-_PMAstim_Th_superenhancers	5209	172	0.000362892	54	1	52	2
HeLa_superenhancers	3656	147	5.29121e-08	32	1	30	2
Brain_Mid_Frontal_Lobe_superenhancers	2269	96	1.05724e-06	14	1	14	0
NHLF_superenhancers	3852	151	1.6107e-07	34	1	32	2
Fetal_Thymus_superenhancers	2804	102	0.000214798	20	1	20	0
Brain_Angular_Gyrus_superenhancers	4871	189	1.09083e-08	46	1	45	1
Toledo_superenhancers	4270	113	0.329623	37	1	35	2
CD4_Memory_Primary_7pool_superenhancers	4859	131	0.247538	45	1	44	1
CD4p_CD25-_Il17p_PMAstim_Th17_superenhancers	4277	135	0.00626899	35	1	35	0
Duodenum_Smooth_Muscle_superenhancers	5165	205	4.52591e-10	46	1	44	2
HSMMtube_superenhancers	6419	297	9.92473e-23	62	1	56	4
NHDF-Ad_superenhancers	3597	136	3.92292e-06	24	1	24	0
Brain_Cingulate_Gyrus_superenhancers	8492	284	2.41835e-06	90	1	82	5
Skeletal_Muscle_superenhancers	4759	161	0.000185213	38	1	36	2
Adipose_Nuclei_superenhancers	6400	213	5.33398e-05	60	1	54	6
Thymus_superenhancers	2720	95	0.00119908	13	1	13	0
H2171_superenhancers	2888	149	8.46861e-16	14	1	13	1
Tonsil_superenhancers	5604	174	0.00438109	47	1	45	2
CD20_superenhancers	5848	171	0.0335482	50	1	49	1
VACO_400_superenhancers	3557	147	1.00389e-08	20	1	18	2
Brain_Anterior_Caudate_superenhancers	7818	284	2.02466e-09	72	1	69	3
Psoas_Muscle_superenhancers	4191	150	2.26031e-05	25	1	25	0
Fetal_Intestine_Large_superenhancers	6236	238	6.54408e-10	50	1	45	5
Stomach_Smooth_Muscle_superenhancers	5139	206	1.83009e-10	36	1	35	1
Aorta_superenhancers	5835	248	6.15921e-15	44	1	39	5
Brain_Inferior_Temporal_Lobe_superenhancers	9151	314	7.55261e-08	88	1	81	7
CD14_superenhancers	7371	224	0.00387493	63	1	59	3
LNCaP_superenhancers	4033	112	0.170111	20	1	18	2
Pancreas_superenhancers	3883	145	3.75306e-06	18	1	17	1
Fetal_Intestine_superenhancers	5899	215	1.37523e-07	40	1	36	4
Right_Ventricle_superenhancers	2122	90	1.97208e-06	2	1	2	0
Adrenal_Gland_superenhancers	5543	215	1.16701e-09	29	1	29	0
Brain_Hippocampus_Middle_superenhancers	9143	328	4.34503e-10	62	1	60	2
Colon_Crypt_1_superenhancers	5108	161	0.00340593	28	1	26	2
Colon_Crypt_2_superenhancers	6232	202	0.000320171	34	1	33	1
Colon_Crypt_3_superenhancers	4141	88	0.960956	19	1	18	1
Esophagus_superenhancers	9334	326	7.65171e-09	47	1	46	1
Fetal_Muscle_superenhancers	7792	288	2.87694e-10	59	1	55	4
Gastric_superenhancers	9209	317	4.87351e-08	49	1	45	4
Left_Ventricle_superenhancers	8617	356	4.85335e-19	67	1	64	3
Lung_superenhancers	10823	434	9.9967e-21	64	1	61	3
Ovary_superenhancers	3698	173	3.05631e-14	15	1	12	2
Pancreatic_islets_superenhancers	8132	280	2.85889e-07	31	1	30	1
Right_Atrium_superenhancers	7303	321	4.41721e-21	46	1	44	2
Sigmoid_Colon_superenhancers	7730	282	1.54524e-09	40	1	39	1
Small_Intestine_superenhancers	7388	295	3.6018e-14	48	1	44	4
Spleen_superenhancers	8561	305	3.54032e-09	43	1	43	0

## Sheet: Histone_ChIPseq_SMARCB1_KD
Set_name	Overlap_with_all_peaks	%all	Overlap_with_weakened_peaks	%LA	Weakened_peak_overlap_pval	Overlap_with_strengthened_peaks	%HA	Strengthened_peak_overlap_pval
H3k4me1	95945	0.585809	3396	0.811276	2.16987e-218	1326	0.424864	1
H3k4me2	67376	0.411376	2559	0.611323	1.2259e-153	1020	0.326818	1
H3k27ac	65347	0.398988	2064	0.493072	4.36002e-36	1106	0.354374	1
H3k9ac	59796	0.365095	1667	0.398232	3.36077e-06	786	0.251842	1
H3k09me3	15826	0.0966284	483	0.115385	2.20989e-05	422	0.135213	1.00846e-12
H2az	84128	0.513658	2185	0.521978	0.134216	1414	0.45306	1
H3k36me3	33179	0.20258	837	0.199952	0.657636	712	0.228132	0.000185479
H3k27me3	27639	0.168755	609	0.145485	0.999981	209	0.0669657	1
H4k20me1StdPk	54942	0.335458	1238	0.295748	1	816	0.261455	1
H3k79me2	31749	0.193849	609	0.145485	1	614	0.196732	0.330763
H3k4me3	34656	0.211598	628	0.150024	1	445	0.142583	1

## Sheet: HOMER_LA_regions
Motif Name	Consensus	P-value	Log P-value	q-value (Benjamini)	# of Target Sequences with Motif (of 4186)	% of Target Sequences with Motif	# of Background Sequences with Motif (of 19691)	% of Background Sequences with Motif
Oct4(POU,Homeobox)/mES-Oct4-ChIP-Seq(GSE11431)/Homer	ATTTGCATAW	1e-98	-227.3	0	1123	0.2683	2811.9	0.1428
Brn1(POU,Homeobox)/NPC-Brn1-ChIP-Seq(GSE35496)/Homer	TATGCWAATBAV	1e-86	-199.3	0	855	0.2043	1989.3	0.101
Oct6(POU,Homeobox)/NPC-Oct6-ChIP-Seq(GSE35496)/Homer	WATGCAAATGAG	1e-85	-196.3	0	1002	0.2394	2518.3	0.1279
Six1(Homeobox)/Myoblast-Six1-ChIP-Chip(GSE20150)/Homer	GKVTCADRTTWC	1e-60	-139.8	0	682	0.163	1653.9	0.084
OCT4-SOX2-TCF-NANOG(POU,Homeobox,HMG)/mES-Oct4-ChIP-Seq(GSE11431)/Homer	ATTTGCATAACAATG	1e-60	-139.2	0	682	0.163	1656.5	0.0841
Oct2(POU,Homeobox)/Bcell-Oct2-ChIP-Seq(GSE21512)/Homer	ATATGCAAAT	1e-52	-119.8	0	675	0.1613	1725.5	0.0876
Jun-AP1(bZIP)/K562-cJun-ChIP-Seq(GSE31477)/Homer	GATGASTCATCN	1e-41	-95.08	0	577	0.1379	1506.8	0.0765
Fosl2(bZIP)/3T3L1-Fosl2-ChIP-Seq(GSE56872)/Homer	NATGASTCABNN	1e-39	-90.35	0	710	0.1697	2021	0.1026
Fra1(bZIP)/BT549-Fra1-ChIP-Seq(GSE46166)/Homer	NNATGASTCATH	1e-38	-87.81	0	954	0.228	2984.7	0.1516
BATF(bZIP)/Th17-BATF-ChIP-Seq(GSE39756)/Homer	DATGASTCAT	1e-33	-78.03	0	1052	0.2514	3462.3	0.1758
Atf3(bZIP)/GBM-ATF3-ChIP-Seq(GSE33912)/Homer	DATGASTCATHN	1e-33	-77.56	0	1078	0.2576	3573.8	0.1815
Sox3(HMG)/NPC-Sox3-ChIP-Seq(GSE33059)/Homer	CCWTTGTY	1e-27	-64.33	0	2267	0.5417	8984.1	0.4563
AP-1(bZIP)/ThioMac-PU.1-ChIP-Seq(GSE21512)/Homer	VTGACTCATC	1e-27	-64.3	0	1154	0.2757	4020.6	0.2042
Bach2(bZIP)/OCILy7-Bach2-ChIP-Seq(GSE44420)/Homer	TGCTGAGTCA	1e-26	-61.35	0	481	0.1149	1357.1	0.0689
Sox2(HMG)/mES-Sox2-ChIP-Seq(GSE11431)/Homer	BCCATTGTTC	1e-24	-57.23	0	1391	0.3324	5118.3	0.26
Sox10(HMG)/SciaticNerve-Sox3-ChIP-Seq(GSE35132)/Homer	CCWTTGTYYB	1e-23	-54	0	2140	0.5114	8538.2	0.4337
Maz(Zf)/HepG2-Maz-ChIP-Seq(GSE31477)/Homer	GGGGGGGG	1e-23	-53.34	0	2171	0.5188	8692.9	0.4415
Ets1-distal(ETS)/CD4+-PolII-ChIP-Seq(Barski_et_al.)/Homer	MACAGGAAGT	1e-21	-48.39	0	699	0.167	2305.8	0.1171
ERG(ETS)/VCaP-ERG-ChIP-Seq(GSE14097)/Homer	ACAGGAAGTG	1e-20	-47.07	0	2460	0.5878	10150.4	0.5155
EWS:FLI1-fusion(ETS)/SK_N_MC-EWS:FLI1-ChIP-Seq(SRA014231)/Homer	VACAGGAAAT	1e-20	-46.76	0	1113	0.2659	4048.4	0.2056
GABPA(ETS)/Jurkat-GABPa-ChIP-Seq(GSE17954)/Homer	RACCGGAAGT	1e-19	-45.85	0	1515	0.362	5817.8	0.2955
ETV1(ETS)/GIST48-ETV1-ChIP-Seq(GSE22441)/Homer	AACCGGAAGT	1e-19	-45.46	0	2111	0.5044	8535.9	0.4335
Etv2(ETS)/ES-ER71-ChIP-Seq(GSE59402)/Homer(0.967)	NNAYTTCCTGHN	1e-19	-45.29	0	1689	0.4036	6605.6	0.3355
ETS1(ETS)/Jurkat-ETS1-ChIP-Seq(GSE17954)/Homer	ACAGGAAGTG	1e-19	-44.84	0	1758	0.4201	6924.3	0.3517
Fli1(ETS)/CD8-FLI-ChIP-Seq(GSE20898)/Homer	NRYTTCCGGH	1e-18	-42.01	0	1773	0.4237	7037.8	0.3574
Sox6(HMG)/Myotubes-Sox6-ChIP-Seq(GSE32627)/Homer	CCATTGTTNY	1e-17	-40.93	0	1957	0.4676	7897.6	0.4011
Pit1(Homeobox)/GCrat-Pit1-ChIP-Seq(GSE58009)/Homer	ATGMATATDC	1e-16	-39.01	0	1049	0.2507	3875.1	0.1968
TEAD4(TEA)/Tropoblast-Tead4-ChIP-Seq(GSE37350)/Homer	CCWGGAATGY	1e-16	-37.87	0	1605	0.3835	6344.7	0.3222
Sox15(HMG)/CPA-Sox15-ChIP-Seq(GSE62909)/Homer	RAACAATGGN	1e-16	-36.99	0	1492	0.3565	5851.9	0.2972
EWS:ERG-fusion(ETS)/CADO_ES1-EWS:ERG-ChIP-Seq(SRA014231)/Homer	ATTTCCTGTN	1e-14	-33.66	0	1307	0.3123	5082.9	0.2582
KLF14(Zf)/HEK293-KLF14.GFP-ChIP-Seq(GSE58341)/Homer	RGKGGGCGKGGC	1e-14	-33.55	0	2556	0.6108	10845.8	0.5509
ZNF467(Zf)/HEK293-ZNF467.GFP-ChIP-Seq(GSE58341)/Homer	TGGGGAAGGGCM	1e-14	-33.07	0	1763	0.4213	7145.6	0.3629
TEAD2(TEA)/Py2T-Tead2-ChIP-Seq(GSE55709)/Homer	CCWGGAATGY	1e-14	-32.81	0	1112	0.2657	4238.3	0.2153
Elk1(ETS)/Hela-Elk1-ChIP-Seq(GSE31477)/Homer	HACTTCCGGY	1e-13	-31.98	0	855	0.2043	3142.7	0.1596
Sox4(HMG)/proB-Sox4-ChIP-Seq(GSE50066)/Homer	YCTTTGTTCC	1e-13	-30.68	0	1282	0.3063	5021.6	0.255
Tcf21(bHLH)/ArterySmoothMuscle-Tcf21-ChIP-Seq(GSE61369)/Homer	NAACAGCTGG	1e-13	-29.97	0	1713	0.4093	6975.4	0.3543
Rfx2(HTH)/LoVo-RFX2-ChIP-Seq(GSE49402)/Homer	GTTGCCATGGCAACM	1e-12	-28.44	0	227	0.0542	644.7	0.0327

## Sheet: HOMER_HA_regions
Motif Name	Consensus	P-value	Log P-value	q-value (Benjamini)	# of Target Sequences with Motif(of 3121)	% of Target Sequences with Motif	# of Background Sequences with Motif(of 18796)	% of Background Sequences with Motif
CTCF(Zf)/CD4+-CTCF-ChIP-Seq(Barski_et_al.)/Homer	AYAGTGCCMYCTRGTGGCCA	1e-41	-95.4	0	1011	0.3239	4108.8	0.2186
BORIS(Zf)/K562-CTCFL-ChIP-Seq(GSE32465)/Homer	CNNBRGCGCCCCCTGSTGGC	1e-34	-78.38	0	937	0.3002	3891	0.2071
GSC(Homeobox)/FrogEmbryos-GSC-ChIP-Seq(DRA000576)/Homer	RGGATTAR	1e-16	-38.55	0	1142	0.3659	5554.7	0.2956
RLR1?/SacCer-Promoters/Homer	WTTTTCYYTTTT	1e-12	-29.89	0	947	0.3034	4611	0.2454
Olig2(bHLH)/Neuron-Olig2-ChIP-Seq(GSE30882)/Homer	RCCATMTGTT	1e-12	-27.79	0	1364	0.437	7050.6	0.3752
