# Supplementary material for: Tumor suppressor SMARCB1 suppresses super-enhancers to govern hESC lineage determination
Source: eLife journal article supplement (doi:10.7554/elife.45672), 2019-04-29
Supplement: supp [file elife-45672-supp-v1.zip › elife_poa_e45672_Supplementary_File_3.xlsx]

## Sheet: Legend
Supplementary Table 3: Top differentially affected genes in control in SMARCB1 KD cells subjected to neural induction.

## Sheet: DEGs
Genes expressed more highly in SMARCB1 KD cells					Genes expressed at lower levels in SMARCB1 KD cells
Gene	q-values	Fold-difference			Gene	q-values	Fold-difference
AC064802.1	4.16554e-07	169.264			AC093484.4	0.000284144	-77.537
SYT4	7.35223e-08	115.327			KCNH5	1.78902e-07	-49.0373
VIT	0.000135736	96.5788			APLNR	5.96516e-05	-38.3792
C9orf135	2.21383e-07	67.8			SLC38A8	1.96332e-07	-37.7842
OR5AC4P	1.23158e-06	66.9027			FAM69C	9.8966e-06	-35.939
AC104257.1	1.35026e-06	61.7535			EDN3	2.72859e-05	-30.8145
OLIG3	2.01723e-08	56.479			CST1	2.06395e-06	-30.5666
CFC1	3.93082e-07	56.3873			ZFHX4-AS1	8.12435e-06	-29.9749
TBX15	1.05914e-06	53.3335			LINC01551	1.12121e-06	-29.1705
CRH	7.96707e-05	52.2334			FOXG1	5.56267e-08	-28.1965
FOXE1	2.4686e-08	50.6787			DLK1	8.02242e-09	-25.8635
SOWAHA	0.000156935	45.637			AL358613.1	1.69588e-05	-24.7209
C11orf96	9.52508e-05	42.2611			BCHE	3.48588e-05	-24.6425
DKK2	1.44028e-05	41.8343			VWF	2.91587e-09	-24.3235
HAND1	3.19224e-05	41.3672			CYP26C1	2.9139e-08	-23.1514
LNCPRESS2	4.47096e-06	40.7326			ATP13A4	1.26859e-05	-23.074
SERPINB9	3.14582e-07	39.8201			COL2A1	1.41151e-05	-21.488
RNA5S4	0.0039137	39.3297			OTOGL	3.04959e-07	-21.2071
AC105243.1	1.50975e-05	39.2565			VCAM1	2.25465e-06	-21.1857
RNA5S15	0.00374778	38.8825			OTOF	0.000757858	-20.454
RNA5S5	0.00199686	38.5511			IL1RAPL1	7.30203e-06	-19.9081
RNA5S16	0.0003244	37.304			GRP	0.000533759	-19.8688
RNA5S6	0.000500643	37.1681			PAX6	1.56627e-08	-18.5138
RNA5S12	0.00556893	37.0157			PRSS33	0.000301471	-18.4758
TDGF1	1.43129e-06	35.898			TLR4	7.99319e-05	-18.0446
RNA5S17	0.000367952	35.8252			AC010980.2	0.00568455	-17.8423
AC097520.1	4.95709e-08	35.5752			ADAM28	3.26366e-08	-17.7896
RNA5S7	0.000619894	35.3594			ARHGEF38	6.26271e-07	-17.5798
AL391650.2	2.4686e-08	34.57			ANGPT2	7.15326e-06	-17.2353
HRASLS5	2.0517e-06	33.8182			AC110023.1	1.277e-06	-17.1123
RNA5S8	0.000728261	33.7822			DCC	1.01456e-05	-17.0184
RNA5S13	0.00854343	33.7547			DMBX1	9.88535e-06	-16.4761
AC008753.3	7.52056e-08	31.4537			PAX7	5.58571e-06	-16.2945
RNA5S10	0.000963389	31.4413			FOLR1	6.61383e-07	-15.6567
AC007218.1	3.69433e-06	31.4093			IP6K3	0.000110404	-15.5097
NANOGP8	2.36899e-05	30.745			RN7SL371P	0.00029495	-15.4563
MT1G	2.95926e-07	28.6374			AC092645.1	0.00116178	-15.4053
PDZD4	3.132e-06	28.6253			AC073172.2	2.07971e-05	-15.38
HOXB1	4.47711e-05	28.1161			PAX3	5.7035e-05	-14.7865
C9orf129	4.43218e-06	27.294			NOS2	1.15328e-08	-14.637
HMX1	0.000167814	26.8475			TRIM29	0.00185323	-14.5346
FGF4	1.99637e-07	26.8295			AC073172.1	7.42698e-05	-14.2058
DLX2	3.9578e-05	25.5283			LHX2	1.45947e-05	-14.1655
EPAS1	5.52845e-06	24.9907			CDH23	1.77564e-08	-14.0579
NKX1-2	1.49456e-06	24.6619			CDH2	8.02242e-09	-14.0224
POU3F4	3.00205e-06	23.978			WNT5B	3.7308e-07	-13.8343
NRK	1.25723e-06	23.9			CACNA2D4	5.02162e-06	-13.8112
LINC01508	4.98193e-07	23.7951			SCUBE1	4.30336e-08	-13.799
NANOG	1.55897e-06	23.5182			AC004066.2	0.0001231	-13.6982
SCNN1B	2.51442e-06	23.3857			ZEB2	1.25081e-06	-13.4503
