# Supplementary material for: Tumor suppressor SMARCB1 suppresses super-enhancers to govern hESC lineage determination
Source: eLife journal article supplement (doi:10.7554/elife.45672), 2019-04-29
Supplement: supp [file elife-45672-supp-v1.zip › elife_poa_e45672_Supplementary_File_4.xlsx]

## Sheet: Legend
Supplementary Table 4: Sheet 1: Differentially expressed genes (q<0.05, FC>1.5) with promoters containing differenitally accessible peaks (q<0.01, FC>2). Sheet 2) List of IPA categories in Nervous System Development and Function with associated p-values of enrichment and activation scores when considering genes within 500 kb of lower accessibility peaks in SMARCB1KD cells following the neural ind…

## Sheet: DEGs with differ acce peaks
Genes expressed at higher levels in SMARCB1 KD condition and with HA peaks in the promoter					Genes expressed at lower levels in SMARCB1 KD condition and with LA peaks in the promoter
chromosome	promoter start	promoter end	Gene		chromosome	promoter start	promoter end	Gene
chr16	84223222	84224722	ADAD2		chr1	94586705	94588205	ABCA4
chr1	167883453	167884953	ADCY10		chr8	6420784	6422284	ANGPT2
chr12	58135944	58137444	AGAP2		chr10	90611732	90613232	ANKRD22
chr7	138458782	138460282	ATP6V0A4		chr11	57004927	57006427	APLNR
chr2	60780633	60782133	BCL11A		chr14	58618847	58620347	C14orf37
chr1	156399184	156400684	C1orf61		chr1	201081694	201083194	CACNA1S
chr3	111803681	111805181	C3orf52		chr12	2027870	2029370	CACNA2D4
chr2	85641197	85642697	CAPG		chr12	6560683	6562183	CD27-AS1
chr19	45279625	45281125	CBLC		chr9	14722715	14724215	CER1
chr21	37440784	37442284	CBR1		chr16	55867075	55868575	CES1
chr10	118082439	118083939	CCDC172		chr17	55980750	55982250	CUEDC1
chr13	28543505	28545005	CDX2		chr5	75919259	75920759	F2RL2
chr13	36429998	36431498	DCLK1		chr1	147245484	147246984	GJA5
chr6	74102784	74104284	DDX43		chr5	151304397	151305897	GLRA1
chr15	78557059	78558559	DNAJA4		chr19	51538148	51539648	KLK12
chr20	31366157	31367657	DNMT3B		chr19	51891210	51892710	LIM2
chr3	109035364	109036864	DPPA2		chr2	26781566	26783066	OTOF
chr3	109056419	109057919	DPPA4		chr16	2836708	2838208	PRSS33
chr5	170209222	170210722	GABRP		chr7	83824217	83825717	SEMA3A
chr19	45581029	45582529	GEMIN7		chr14	61116155	61117655	SIX1
chr9	36135241	36136741	GLIPR2		chr12	108991894	108993394	TMEM119
chr10	106012967	106014467	GSTO1		chr11	120008863	120010363	TRIM29
chr12	14849519	14851019	GUCY2C		chr1	216596738	216598238	USH2A
chr5	153857824	153859324	HAND1		chr12	6233836	6235336	VWF
chr7	27135625	27137125	HOXA1		chr4	106472276	106473776	ARHGEF38
chr17	46608272	46609772	HOXB1		chr1	160084019	160085519	ATP1A2
chr17	46622393	46623893	HOXB2		chr17	77028880	77030380	C1QTNF1
chr12	54331075	54332575	HOXC13		chr19	48323598	48325098	CRX
chr2	8820612	8822112	ID2		chr7	154000846	154002346	DPP6
chr19	51568367	51569867	KLK13		chr6	123099145	123100645	FABP7
chr13	46756459	46757959	LCP1		chr11	71901672	71903172	FOLR1
chr4	41613418	41614918	LIMCH1		chr2	11681350	11682850	GREB1
chr1	156094450	156095950	LMNA		chr2	11678579	11680079	GREB1
chr8	143780028	143781528	LY6K		chr13	113654527	113656027	MCF2L
chr19	43969831	43971331	LYPD3		chr17	60703261	60704761	MRC2
chr1	116652875	116654375	MAB21L3		chr10	129844312	129845812	PTPRE
chr4	113569407	113570907	MIR302A		chr2	108903594	108905094	SULT1C2
chr4	113569586	113571086	MIR302C		chr2	234824542	234826042	TRPM8
chr4	113569227	113570727	MIR302D
chr16	3095181	3096681	MMP25
chr16	56658084	56659584	MT1E
chr14	21493935	21495435	NDRG2
chr19	3931600	3933100	NMRK2
chr1	107681244	107682744	NTNG1
chr6	137815531	137817031	OLIG3
chr11	72981746	72983246	P2RY6
chr18	57565691	57567191	PMAIP1
chr6	31138451	31139951	POU5F1
chr17	46035243	46036743	PRR15L
chr7	45195866	45197366	RAMP3
chr4	155700926	155702426	RBM46
chr10	13390298	13391798	SEPHS1
chr3	170744768	170746268	SLC2A2
chr14	95942173	95943673	SYNE3
chr1	119532179	119533679	TBX15
chr10	115937528	115939028	TDRD1
chr19	33209178	33210678	TDRD12
chrX	70128567	70130067	TEX11
chr7	100239173	100240673	TFR2
chr7	76138244	76139744	UPK3B
chr14	74813665	74815165	VRTN
chr1	117753582	117755082	VTCN1
chr3	167371289	167372789	WDR49
chr4	188915424	188916924	ZFP42
chrX	136646845	136648345	ZIC3
chr7	148843059	148844559	ZNF398
chr19	9609279	9610779	ZNF560
chr16	3142861	3144361	ZSCAN10

## Sheet: Enriched_Developmental_Pathways
Categories	Diseases or Functions Annotation	p-Value	Predicted Activation State	Activation z-score	# Molecules
Nervous System Development and Function	Morphology of nervous system	4.76e-41			264
Cellular Development, Cellular Growth and Proliferation, Nervous System Development and Function, Tissue Development	Development of neurons	2.6e-40	Decreased	-2.935	233
Nervous System Development and Function, Neurological Disease	Abnormal morphology of nervous system	1.26e-37			228
Nervous System Development and Function	Development of central nervous system	1.48e-33		-0.104	192
Nervous System Development and Function	Morphology of central nervous system	5.5e-32			172
Nervous System Development and Function	Sensory system development	1.44e-31		-0.776	153
Nervous System Development and Function, Organ Morphology, Organismal Development	Morphology of brain	9.67e-30			157
Embryonic Development, Nervous System Development and Function, Organ Development, Organismal Development, Tissue Development	Formation of brain	1.75e-28		-1.312	154
Nervous System Development and Function, Neurological Disease	Abnormal morphology of central nervous system	2.51e-28			145
Nervous System Development and Function, Neurological Disease, Organ Morphology, Organismal Development, Organismal Injury and Abnormalities	Abnormal morphology of brain	8.41e-28			135
Nervous System Development and Function, Tissue Morphology	Morphology of nervous tissue	1.56e-27			168
Cell Morphology, Cellular Development, Cellular Growth and Proliferation, Nervous System Development and Function, Organismal Development, Tissue Development	Morphogenesis of neurons	1.78e-27	Decreased	-2.03	169
Embryonic Development, Nervous System Development and Function, Organ Development, Organismal Development, Tissue Development, Visual System Development and Function	Formation of eye	1.93e-27		-1.135	135
Cell Morphology, Nervous System Development and Function, Tissue Morphology	Morphology of neurons	2.66e-27			165
Cell Morphology, Cellular Assembly and Organization, Cellular Development, Cellular Function and Maintenance, Cellular Growth and Proliferation, Nervous System Development and Function, Organismal Development, Tissue Development	Neuritogenesis	1.02e-26	Decreased	-2.03	166
Cellular Movement, Nervous System Development and Function	Migration of neurons	1.26e-24		0.355	85
Nervous System Development and Function, Tissue Morphology	Quantity of nervous tissue	5.62e-24		-1.454	121
Cellular Development, Nervous System Development and Function, Tissue Development	Differentiation of neurons	9.81e-24		0.057	122
Cell Morphology, Nervous System Development and Function, Neurological Disease, Tissue Morphology	Abnormal morphology of neurons	1.25e-23			136
Nervous System Development and Function, Tissue Morphology	Quantity of neurons	3.2e-23		-1.279	119
Embryonic Development, Nervous System Development and Function, Organ Development, Organismal Development, Tissue Development	Formation of forebrain	2.27e-21	Decreased	-3.113	82
Cellular Development, Cellular Growth and Proliferation, Nervous System Development and Function, Tissue Development	Proliferation of neuronal cells	4.18e-21		-0.313	140
Cell-To-Cell Signaling and Interaction, Cellular Assembly and Organization, Cellular Development, Cellular Function and Maintenance, Cellular Growth and Proliferation, Nervous System Development and Function, Tissue Development	Developmental process of synapse	2.11e-20	Decreased	-2.309	73
Cellular Development, Cellular Growth and Proliferation, Nervous System Development and Function, Tissue Development	Growth of neurites	7.66e-19		-0.048	120
Cellular Movement, Nervous System Development and Function	Guidance of axons	1.61e-17		-0.728	54
Nervous System Development and Function	Sensation	4.11e-17		-0.131	89
Embryonic Development, Nervous System Development and Function, Organ Development, Organismal Development, Tissue Development	Formation of telencephalon	4.34e-17	Decreased	-2.598	55
Nervous System Development and Function, Neurological Disease, Organ Morphology, Organismal Development, Organismal Injury and Abnormalities	Abnormal morphology of forebrain	4.31e-16			65
Nervous System Development and Function, Organ Morphology, Organismal Development	Morphology of forebrain	6.1e-16			71
Cell-To-Cell Signaling and Interaction, Nervous System Development and Function	Neurotransmission	9.69e-16		-0.313	100
Embryonic Development, Nervous System Development and Function, Organ Development, Organ Morphology, Organismal Development, Tissue Development, Visual System Development and Function	Morphology of eye	1.04e-15			83
Nervous System Development and Function	Morphology of nerves	3.5e-15			46
Embryonic Development, Nervous System Development and Function, Ophthalmic Disease, Organ Development, Organ Morphology, Organismal Development, Organismal Injury and Abnormalities, Tissue Development, Visual System Development and Function	Abnormal morphology of eye	7.9e-15			73
Cellular Development, Cellular Growth and Proliferation, Nervous System Development and Function, Tissue Development	Outgrowth of neurites	1.34e-14		-0.962	97
Cell-To-Cell Signaling and Interaction, Nervous System Development and Function	Synaptic transmission	2.35e-14		-0.576	83
Cell Morphology, Nervous System Development and Function	Innervation	1.11e-13		-1.699	46
Nervous System Development and Function, Organ Morphology, Organismal Development	Morphology of telencephalon	5.01e-13			54
Cell Morphology, Cellular Assembly and Organization, Cellular Development, Cellular Function and Maintenance, Cellular Growth and Proliferation, Nervous System Development and Function, Organismal Development, Tissue Development	Axonogenesis	6.29e-13		0.198	62

## Sheet: Neural_dev_hits_500kb_LA_region
Gene	log2(FD)	q-value		Gene	log2(FD)	q-value		Gene	log2(FD)	q-value
FOXG1	-4.817	5.56e-08		NLGN1	-1.699	5.81e-06		SKIL	1.297	6.23e-06
DLK1	-4.693	8.02e-09		PTPRE	-1.688	0.00141126		CHRNB2	1.344	0.000167867
IL1RAPL1	-4.315	7.3e-06		NGFR	-1.673	7.01e-07		CSF1	1.346	0.000587467
PAX6	-4.211	1.57e-08		SCN4B	-1.673	0.00584964		FOS	1.359	6.34e-05
IP6K3	-3.955	0.000110404		NIN	-1.634	1.79e-08		RHOB	1.381	9.16e-06
CDH2	-3.81	8.02e-09		SULF2	-1.617	1.52e-07		ID1	1.394	1.85e-06
ZEB2	-3.75	1.25e-06		MDGA1	-1.587	0.000378122		SYNDIG1	1.429	0.000852485
POU4F1	-3.672	2.13e-07		PDGFRA	-1.586	3.79e-06		EIF4EBP1	1.441	8.32e-06
FOXC1	-3.609	6.25e-07		PDGFRB	-1.584	6.46e-06		ADAP1	1.503	0.00660159
FGF8	-3.567	8.2e-07		ROR2	-1.555	4.86e-07		GAS7	1.697	2.68e-06
NEUROG2	-3.565	0.00137275		NTF3	-1.542	0.000221135		SOCS1	1.75	0.000829253
EPHA4	-3.296	2.92e-09		FLRT2	-1.535	1.85e-06		CBLN1	1.769	0.000116812
CBLN2	-3.165	0.00295927		CNTNAP2	-1.531	6.25e-07		SGK1	1.809	8.27e-07
ENC1	-3.078	1.66e-09		SLITRK6	-1.516	9.33e-05		CAV1	1.821	0.0015557
SEMA3E	-2.914	4.05e-08		AMIGO2	-1.511	0.00498645		AGAP2	1.9	0.00356737
TRPC6	-2.77	4.96e-06		SMAD3	-1.487	1.9e-05		JUN	1.913	3.13e-06
S1PR3	-2.721	1.07e-06		LRP4	-1.457	4.02e-07		PTGS2	2.003	9.03e-05
TPBG	-2.716	1.66e-09		MAFB	-1.453	9.53e-05		PIP5K1B	2.028	3.28e-05
FABP7	-2.692	1.21e-06		SNCA	-1.421	0.000916507		CXCL12	2.048	1.32e-07
LRRTM1	-2.668	1.07e-05		EPHB2	-1.356	2.67e-07		PARD6A	2.127	0.000183591
SLITRK4	-2.627	1.5e-07		SLITRK1	-1.341	0.00169579		NFIA	2.135	6.95e-05
EPHA7	-2.538	2.02e-08		SEMA3F	-1.34	5.15e-07		COL25A1	2.143	1.04e-06
CDKN1A	-2.536	3.59e-06		VEGFA	-1.29	2.98e-07		NEFH	2.154	0.000127613
SIX3	-2.499	2.44e-05		EFNA5	-1.247	1.66e-06		NEFL	2.18	7.17e-07
ERBB4	-2.466	2.87e-06		DPYSL5	-1.243	5.16e-05		ACE	2.289	1.17e-05
WNT3	-2.335	0.0012139		SOX11	-1.199	2.36e-09		THBS2	2.392	1.85e-06
LINGO2	-2.23	0.000143826		NOTCH1	-1.158	3.31e-05		EZR	2.519	8.02e-09
SULF1	-2.215	3e-06		NCAM1	-1.133	0.000310162		DCLK1	2.559	3.93e-08
GHRL	-2.169	0.00146427		NRXN2	-1.129	0.00169579		L1CAM	2.62	2.05e-05
EGF	-2.133	6.1e-06		ITGA3	-1.119	1.17e-05		GRID2	2.667	1.93e-07
GLI3	-2.132	3.32e-08		LRRC4	-1.081	0.000104041		ANGPT1	2.988	2.19e-05
SDK2	-2.11	3.24e-08		ADAM22	-1.07	6.4e-06		ATOH1	3.044	0.00182771
EFNB1	-2.046	2.01e-07		THBS1	1.031	8.73e-06		NFIB	3.046	1.26e-06
WNT5A	-2.014	3.66e-06		MT2A	1.114	0.00133258		RIT2	3.092	0.000387329
HES1	-1.967	4.17e-07		CHN1	1.121	6.61e-07		INHBA	3.257	7.01e-06
SDC2	-1.856	2.23e-08		FGF2	1.155	2.69e-07		DLX1	3.662	3.83e-05
LRRC4B	-1.794	1.75e-05		HEY1	1.158	0.00314234		RYR2	3.732	1.8e-08
PTPRD	-1.76	4.06e-08		SLIT1	1.186	0.00141351		DLX2	4.674	3.96e-05
NTN1	-1.732	3.53e-07		KNDC1	1.221	0.000157454		FGF4	4.746	2e-07
SERPINF1	-1.711	7.31e-08		PRKCA	1.223	4.88e-05		CRH	5.707	7.97e-05
