# Supplementary material for: Tumor suppressor SMARCB1 suppresses super-enhancers to govern hESC lineage determination
Source: eLife journal article supplement (doi:10.7554/elife.45672), 2019-04-29
Supplement: supp [file elife-45672-supp-v1.zip › elife_poa_e45672_Supplementary_File_5.xlsx]

## Sheet: Legend
Supplemental Table 5: Superenhancers with higher expression levels, and those that are near genes with differential expression levels Sheet 1: Column A: Tissue/cell line; Column B: Number of defined super-enhancers in tissue/cell line; Column C: Number of all considered accessible regions that overlap super-enhancers; Column D: Percentage of all considered accessible regions that overlap super-en…

## Sheet: LA_HA_regions_Super-enh_overlap
Superenhancer set	Number of SEs	number of all considered regions that overlap SEs	percentage of all considered regions that overlap SEs	number of lower accessibility regions that overlap SEs	percentage of lower accessibility regions that overlap SEs	p-value lower accessibility regions	number of higher accessibility regions that overlap	percentage of higher accessibility regions that overlap	p-value higher accessibility regions
H1 hESCs	684	1654	1.86	73	0.54	1	371	4.76	5.99707e-65
HCC1954	477	1604	1.81	228	1.67	0.890919	149	1.91	0.222944
Panc1	355	2245	2.53	236	1.73	1	182	2.33	0.869228
NCI-H69	129	477	0.54	74	0.54	0.427249	34	0.44	0.888024
MCF-7	117	445	0.5	61	0.45	0.812962	30	0.38	0.929869
GLC16	102	381	0.43	34	0.25	0.999858	24	0.31	0.95335
HepG2	497	829	0.93	86	0.63	0.999982	59	0.76	0.953451
Adipose Tissue	71	155	0.17	9	0.07	0.999787	7	0.09	0.967336
HBL1	461	1637	1.84	202	1.48	0.999723	121	1.55	0.977756
GM12878	257	790	0.89	99	0.73	0.985933	53	0.68	0.980809
RPMI-8402	220	755	0.85	138	1.01	0.0120492	50	0.64	0.98262
CD14	1019	4353	4.9	468	3.44	1	344	4.41	0.982873
CD34 fetal	147	215	0.24	20	0.15	0.993592	10	0.13	0.984543
NHEK	1024	2482	2.8	270	1.98	1	188	2.41	0.984944
MM1S	640	1188	1.34	165	1.21	0.913846	83	1.06	0.986607
CD34 adult	234	450	0.51	34	0.25	1	26	0.33	0.988725
HSMM	743	2018	2.27	313	2.3	0.400245	147	1.88	0.992434
u87	1073	3191	3.6	470	3.45	0.828917	242	3.1	0.993073
IMR90	502	1430	1.61	140	1.03	1	99	1.27	0.994414
CD34 Primary RO01549	326	764	0.86	73	0.54	0.999998	47	0.6	0.995738
NCI-H82	67	258	0.29	57	0.42	0.00154154	11	0.14	0.996133
Jurkat	487	1221	1.38	199	1.46	0.164506	81	1.04	0.996728
Osteoblasts	1089	4301	4.85	608	4.47	0.987533	328	4.2	0.997308
Skeletal Muscle Myoblast	645	1665	1.88	272	2	0.120873	113	1.45	0.998482
Ly3	790	2240	2.52	222	1.63	1	158	2.03	0.99857
DND41	442	1465	1.65	180	1.32	0.999548	97	1.24	0.998711
HMEC	1099	2912	3.28	358	2.63	0.999999	210	2.69	0.999037
Ly4	786	2174	2.45	275	2.02	0.999825	149	1.91	0.999503
DHL6	566	1819	2.05	162	1.19	1	120	1.54	0.999685
Astrocytes	650	1943	2.19	220	1.62	1	125	1.6	0.999933
CD34 Primary RO01536	733	2335	2.63	204	1.5	1	153	1.96	0.999966
Ly1	530	2112	2.38	312	2.29	0.75743	134	1.72	0.999983
CD34 Primary RO01480	456	895	1.01	53	0.39	1	45	0.58	0.999988
CD20	970	3619	4.08	357	2.62	1	248	3.18	0.999992
Adipose Nuclei	781	4016	4.53	515	3.78	0.999998	277	3.55	0.999996
Duodenum Smooth Muscle	751	3418	3.85	424	3.11	1	227	2.91	0.999998
Toledo	782	2647	2.98	265	1.95	1	168	2.15	0.999998
CD4p CD25- Il17- PMAstim Th	867	3099	3.49	322	2.37	1	200	2.56	0.999999
K562	742	2127	2.4	138	1.01	1	127	1.63	0.999999
CD19 Primary	688	1842	2.08	141	1.04	1	106	1.36	0.999999
CD4 Memory Primary 8pool	410	968	1.09	54	0.4	1	44	0.56	1
Bladder	249	1225	1.38	97	0.71	1	61	0.78	1
NHDF-Ad	612	2318	2.61	281	2.06	0.999996	138	1.77	1
HUVEC	912	2727	3.07	331	2.43	0.999999	168	2.15	1
VACO 9m	371	1209	1.36	82	0.6	1	59	0.76	1
CD8 Naive 8pool	375	1038	1.17	83	0.61	1	47	0.6	1
CD4 Naive Primary 8pool	571	1216	1.37	78	0.57	1	58	0.74	1
Fetal Thymus	481	1758	1.98	222	1.63	0.999372	95	1.22	1
CD3	664	1720	1.94	138	1.01	1	90	1.15	1
Fetal Intestine Large	1021	4361	4.91	435	3.2	1	282	3.61	1
CD4p CD25- CD45ROp Memory	474	1770	1.99	133	0.98	1	91	1.17	1
Thymus	559	1770	1.99	154	1.13	1	91	1.17	1
HCT-116	387	1959	2.21	155	1.14	1	104	1.33	1
Brain Angular Gyrus	719	3160	3.56	406	2.98	0.999971	190	2.44	1
HSMMtube	1029	4080	4.6	587	4.31	0.956894	257	3.29	1
CD4p CD25- CD45RAp Naive	465	1912	2.15	150	1.1	1	98	1.26	1
CD8 Naive 7pool	462	977	1.1	51	0.37	1	37	0.47	1
Fetal Intestine	919	4124	4.65	398	2.92	1	258	3.31	1
Stomach Smooth Muscle	611	3423	3.86	397	2.92	1	204	2.62	1
CD4 Naive Primary 7pool	479	1109	1.25	82	0.6	1	44	0.56	1
CD4 Memory Primary 7pool	1015	3247	3.66	237	1.74	1	191	2.45	1
Brain Hippocampus Middle 150	1039	4682	5.28	551	4.05	1	298	3.82	1
CD8 primiary	776	2575	2.9	213	1.56	1	142	1.82	1
CD4p CD225int CD127p Tmem	444	1242	1.4	72	0.53	1	50	0.64	1
CD56	763	2391	2.69	185	1.36	1	125	1.6	1
VACO 503	556	2350	2.65	124	0.91	1	122	1.56	1
Aorta	703	3758	4.23	473	3.47	0.999999	222	2.85	1
NHLF	784	2630	2.96	236	1.73	1	141	1.81	1
Tonsil	979	3587	4.04	355	2.61	1	208	2.67	1
HeLa	698	2593	2.92	223	1.64	1	137	1.76	1
Brain Cingulate Gyrus	1005	5320	5.99	682	5.01	1	336	4.31	1
Right Ventricle	390	1506	1.7	123	0.9	1	64	0.82	1
Brain Anterior Caudate	907	5021	5.66	637	4.68	1	313	4.01	1
CD8 Memory 7pool	712	1992	2.24	125	0.92	1	95	1.22	1
Skeletal Muscle	618	3163	3.56	347	2.55	1	175	2.24	1
Brain Mid Frontal Lobe	357	1558	1.76	166	1.22	1	65	0.83	1
Psoas Muscle	505	2845	3.21	292	2.14	1	148	1.9	1
LNCaP	539	2775	3.13	208	1.53	1	143	1.83	1
CD4p CD25- Il17p PMAstim Th17	871	2760	3.11	202	1.48	1	141	1.81	1
VACO 400	635	2610	2.94	258	1.9	1	129	1.65	1
Colon Crypt 1	665	3537	3.99	305	2.24	1	191	2.45	1
Left Ventricle	972	5579	6.29	646	4.75	1	337	4.32	1
H2171	357	1934	2.18	332	2.44	0.0119865	60	0.77	1
Ovary	478	2540	2.86	306	2.25	0.999999	110	1.41	1
Brain Inferior Temporal Lobe	1067	5750	6.48	738	5.42	1	331	4.24	1
Adrenal Gland	680	3752	4.23	341	2.5	1	172	2.2	1
Brain Hippocampus Middle	908	6003	6.76	673	4.94	1	326	4.18	1
Colon Crypt 2	958	4396	4.95	328	2.41	1	199	2.55	1
Colon Crypt 3	644	2965	3.34	155	1.14	1	140	1.79	1
Esophagus	1096	6464	7.28	628	4.61	1	341	4.37	1
Fetal Muscle	1339	5254	5.92	576	4.23	1	245	3.14	1
Gastric	1081	6351	7.16	612	4.5	1	324	4.15	1
Lung	1286	7161	8.07	736	5.41	1	416	5.33	1
Pancreas	591	2811	3.17	219	1.61	1	122	1.56	1
Pancreatic islets	708	5585	6.29	537	3.94	1	245	3.14	1
Right Atrium	889	4818	5.43	543	3.99	1	238	3.05	1
Sigmoid Colon	1023	5257	5.92	481	3.53	1	263	3.37	1
Small Intestine	946	4974	5.6	474	3.48	1	270	3.46	1
Spleen	1197	5763	6.49	491	3.61	1	315	4.04	1

## Sheet: Differential_SEs
chromosome	Start	End	q value	log2(Fold difference)	Control groupMean	SMARCB1 KD groupMean
chr18	18841820	18845978	3.38226e-05	-2.95145	61.1956	7.91124
chr4	62776205	62780712	0.0113204	-2.02066	38.5289	9.4953
chr11	15569171	15581663	2.25336e-05	-1.5644	311.573	105.349
chr9	73731666	73739178	0.0013314	-1.42335	183.405	68.3817
chr1	205413088	205426775	3.3741e-07	-1.33715	1473.37	583.164
chr5	124072975	124085809	4.43283e-06	-1.20155	1618.38	703.685
chr12	23781919	23795042	0.00438665	-1.11904	186.826	86.015
chr13	100307929	100315975	0.00219125	-1.074	118.7	56.3824
chr12	66285808	66295951	0.00156073	-1.04754	314.996	152.393
chr1	156660783	156678371	3.73251e-07	-1.04238	5433.87	2638.29
chr8	95446077	95451847	0.00139683	-1.02636	336.133	165.024
chr4	95455687	95463291	0.0294704	-1.01936	89.1555	43.9834
chr12	25098710	25105009	0.000716215	-0.975883	501.523	254.989
chr2	5864235	5868108	0.0434175	-0.965773	83.9924	43.0044
chr10	21811220	21818929	0.0010753	-0.879711	280.603	152.501
chr7	102251105	102257219	0.019119	-0.79991	115.432	66.3022
chr2	5830499	5838247	8.77862e-06	-0.763924	6496.69	3825.85
chr18	4106672	4120731	0.00368905	-0.75894	277.596	164.04
chr8	26492987	26500335	0.0486892	-0.707656	86.1109	52.7269
chr18	60417819	60427338	0.0304286	-0.658774	191.266	121.151
chr11	27462675	27473510	0.000183574	-0.626034	3070.96	1989.84
chr10	21796602	21802609	0.0190491	-0.622549	404.15	262.505
chr1	150227940	150233165	0.00678693	-0.605534	407.671	267.933
chr3	98043173	98048442	0.0398229	0.585225	145.409	218.153
chr2	233283339	233297968	0.000685768	0.589679	787.453	1185.05
chr12	109894767	109900569	0.0172462	0.597619	169.322	256.221
chr10	96968790	97002079	8.3451e-06	0.60528	2167.76	3297.75
chr1	174839063	174847381	0.00197473	0.621878	629.182	968.234
chr2	206941994	206952373	0.000318989	0.629663	730.014	1129.48
chr1	232245888	232268729	0.0113204	0.643414	268.31	419.106
chr16	3147057	3156558	0.000167627	0.648764	718.563	1126.58
chr13	56226813	56249478	0.0159373	0.682373	122.306	196.275
chr3	109052673	109076350	1.69732e-05	0.702995	2086.77	3397.01
chr4	119769625	119772884	0.0109321	0.731639	106.149	176.262
chr10	21783014	21786913	0.000339589	0.734069	492.341	818.922
chr2	70310897	70317294	1.90662e-05	0.743236	1216.23	2035.89
chr2	37408750	37455907	8.77862e-06	0.743965	9688.54	16226.1
chr11	305133	319769	6.17e-06	0.745492	3609.23	6051.04
chr10	52384398	52386855	0.0157773	0.756809	71.6946	121.146
chr8	76127652	76136632	0.0203984	0.760971	119.178	201.962
chr7	100935112	100952570	3.30224e-06	0.767574	2082.42	3545.12
chr22	41840515	41844565	0.0160236	0.773492	113.948	194.783
chr9	90012142	90032394	4.32138e-05	0.778705	733.149	1257.78
chr15	64990942	64995475	0.00186088	0.785897	190.019	327.624
chr4	123747276	123752828	0.00324146	0.785982	218.626	376.969
chr12	9057289	9069870	0.000134018	0.799647	571.923	995.532
chr10	65024509	65029727	0.0037591	0.808161	256.822	449.69
chr9	138884394	138910016	0.000480846	0.812081	554.733	973.969
chr13	29001673	29031886	4.32138e-05	0.840174	802.462	1436.62
chr7	83075053	83095321	7.22676e-05	0.847478	472.081	849.441
chr6	131642371	131659796	0.0038064	0.849434	141.287	254.569
chr20	33847600	33865609	3.1645e-06	0.85011	1223.14	2204.88
chr10	13387895	13394666	0.00063926	0.868801	275.882	503.8
chr13	54837849	54848214	0.0468583	0.872845	37.7438	69.1191
chr14	90079324	90087631	0.00302358	0.882159	133.137	245.388
chr6	10554770	10560338	4.43164e-05	0.883813	533.242	983.963
chr10	103876642	103882553	0.000788547	0.887172	185.997	344.01
chr7	5568917	5573171	0.000318989	0.898181	3405.67	6347.2
chr2	155438504	155448535	0.0163906	0.912408	63.9133	120.297
chr11	70956381	70964269	0.00670105	0.912787	68.3612	128.702
chr5	12621255	12628234	0.00184101	0.919936	96.9753	183.48
chrX	136632477	136669030	4.13054e-06	0.937629	1545.59	2960.39
chr2	201170570	201189081	0.00261986	0.940817	161.815	310.622
chr4	189028354	189031694	0.00429589	0.944222	153.433	295.227
chr1	161169650	161172721	0.0163906	0.948545	49.4825	95.4975
chr16	19869536	19874100	6.48705e-06	0.95661	929.537	1803.99
chr5	33442859	33450441	6.4311e-06	0.969688	791.118	1549.34
chr6	144927395	144939187	0.00024016	0.999001	254.948	509.542
chr12	14863465	14868433	0.0124172	1.01085	37.172	74.9051
chr8	73911955	73923527	5.32627e-06	1.01702	785.305	1589.25
chr17	4850778	4854004	1.62802e-05	1.0434	951.095	1960.29
chr9	16707701	16727600	0.000413331	1.04639	153.604	317.247
chr15	57676691	57681427	0.0111627	1.04802	63.9296	132.186
chr2	188895913	188899159	0.000657876	1.08641	108.931	231.309
chr6	15239497	15248649	8.3451e-06	1.10206	812.509	1744.13
chr6	114661135	114666937	0.0240247	1.16168	40.4814	90.5639
chrX	16058328	16069062	0.00137727	1.17237	60.9047	137.268
chr4	113568793	113574649	0.000120554	1.19807	2294.87	5265.17
chr14	77489027	77500605	1.03739e-06	1.22536	1092.92	2555.4
chr17	37894120	37910578	2.16366e-07	1.22596	874.328	2045.14
chr2	232570591	232582722	9.86052e-09	1.23635	27096.5	63840.1
chr9	76693189	76708679	0.000132928	1.24606	129.485	307.129
chr13	53310333	53314265	8.77862e-06	1.41215	209.794	558.334
chr7	131232529	131243841	8.3451e-06	1.47577	307.219	854.475
chr16	9762865	9776020	2.25336e-05	1.51074	134.251	382.557
chr1	27324282	27337801	5.82896e-09	1.53117	1020.99	2950.87
chr4	93353168	93371866	4.71086e-06	1.63534	182.366	566.539
chrX	91353867	91368064	3.81297e-07	1.75143	341.997	1151.48
chr12	7939355	7952450	1.26388e-08	1.80929	793.028	2779.33
chr2	76794677	76809669	0.000122992	1.85855	46.4858	168.577
chr3	176036629	176047755	4.11219e-07	1.91301	128.341	483.323
chr20	12728583	12743237	2.49828e-08	1.94539	415.771	1601.31
chr7	20157258	20169780	0.000312376	1.99124	18.5892	73.9066
chr1	223194419	223205707	9.27423e-06	2.00355	130.643	523.86
chr14	74812672	74818024	2.31303e-07	2.0575	115.402	480.378
chr5	25443805	25449125	2.16366e-07	2.37453	112.273	582.211
chr22	18913049	18936254	9.38218e-12	2.49938	1966.38	11118.8
chr11	27649593	27659360	1.49087e-07	2.52233	137.675	790.951
chr2	64069045	64084021	9.82166e-10	2.62206	1158.84	7134.16
chr2	8011035	8021930	5.44308e-05	2.78761	14.0696	97.1484
chr9	99975793	99985328	5.51887e-08	2.88551	110.15	813.974
chr8	72582567	72593676	1.49087e-07	2.92813	70.7516	538.509
chr5	106311634	106322065	6.27136e-05	3.14514	15.7826	139.625
chr3	46612993	46621393	6.07307e-11	3.20326	496.446	4572.46
chr2	60775623	60783139	7.5261e-05	3.30198	8.86362	87.419
chr4	93192146	93201519	3.00581e-07	3.36386	30.9537	318.665
chr14	38656566	38667401	2.31303e-07	3.44199	35.3467	384.141
chr6	31136274	31142397	9.82166e-10	3.78103	379.242	5213.38
chr5	147240757	147256092	5.82896e-09	3.82313	90.2809	1277.83
chr2	64477819	64487296	1.51665e-07	3.92591	24.8932	378.353
chr6	114740588	114751877	1.49087e-07	4.01296	22.8285	368.554
chr13	56149039	56159588	5.82896e-09	4.56692	67.5399	1600.82

## Sheet: Differential_SE_gene_matches
Gene	q value	log2(FD)	SE chromosome	SE start	SE end	Distance to SE
TDGF1	1.43129e-06	5.16583	chr3	46612993	46621393	0
NANOG	1.55897e-06	4.5557	chr12	7939355	7952450	0
TRIML2	6.53515e-07	4.04616	chr4	189028354	189031694	1946
FLT1	2.4686e-08	3.91122	chr13	29001673	29031886	37379
BCL11A	1.50167e-06	3.76246	chr2	60775623	60783139	0
SCGB3A2	2.60365e-07	3.48281	chr5	147240757	147256092	2181
POU5F1	7.08624e-08	3.46435	chr6	31136274	31142397	0
BNC2	1.59358e-08	3.08737	chr9	16707701	16727600	143186
UGP2	1.15372e-08	2.93817	chr2	64069045	64084021	32
GUCY2C	8.59656e-05	2.80275	chr12	14863465	14868433	13946
GRID2	1.92607e-07	2.66714	chr4	93353168	93371866	127619
GRID2	1.92607e-07	2.66714	chr4	93192146	93201519	24030
SSTR1	0.00120433	2.59876	chr14	38656566	38667401	9802
GRPR	2.90051e-05	2.54881	chrX	16058328	16069062	72361
PODXL	6.2773e-05	2.52037	chr7	131232529	131243841	0
VRTN	4.95877e-08	2.43575	chr14	74812672	74818024	0
CGNL1	5.9252e-08	2.38607	chr15	57676691	57681427	7989
SEPHS1	9.28266e-05	2.36525	chr10	13387895	13394666	0
PHC1	1.05839e-05	2.32531	chr12	9057289	9069870	0
ALPPL2	0.000138833	2.31327	chr2	233283339	233297968	11788
SPATS2L	2.3755e-07	2.13632	chr2	201170570	201189081	0
TERF1	3.1791e-06	2.13066	chr8	73911955	73923527	0
FAM46B	2.32945e-08	2.12511	chr1	27324282	27337801	1532
ZIC3	2.58754e-07	2.07243	chrX	136632477	136669030	0
HS3ST5	0.000438313	1.95173	chr6	114661135	114666937	277094
HS3ST5	0.000438313	1.95173	chr6	114740588	114751877	356547
GRB7	3.132e-06	1.78919	chr17	37894120	37910578	0
ZSCAN10	5.98082e-06	1.75396	chr16	3147057	3156558	4196
MIR367	0.0141171	1.71316	chr4	113568793	113574649	0
RABGAP1L	8.9505e-09	1.65809	chr1	174839063	174847381	86523
SGMS1	3.80364e-07	1.63662	chr10	52384398	52386855	661
MIR302C	1.45381e-05	1.60613	chr4	113568793	113574649	0
TARS	2.49498e-06	1.60102	chr5	33442859	33450441	1978
DPPA4	1.11872e-05	1.54266	chr3	109052673	109076350	0
SEC24D	7.16172e-07	1.50062	chr4	119769625	119772884	12299
DAPK1	8.02242e-09	1.40695	chr9	90012142	90032394	80361
MIR302D	0.000141275	1.39137	chr4	113568793	113574649	0
JARID2	8.96868e-07	1.33089	chr6	15239497	15248649	436
MIR302A	0.000114583	1.30602	chr4	113568793	113574649	0
IRF2BPL	1.96621e-07	1.28181	chr14	77489027	77500605	0
SHANK2	2.69867e-06	1.16505	chr11	70956381	70964269	20573
FGF2	2.68756e-07	1.15506	chr4	123747276	123752828	0
FOXN3	3.43333e-06	0.968308	chr14	90079324	90087631	0
PTMA	1.20163e-06	0.92719	chr2	232570591	232582722	0
GCNT2	2.62116e-07	0.847483	chr6	10554770	10560338	25654
PFN1	1.72642e-07	0.808541	chr17	4850778	4854004	0
PRODH	2.67824e-06	0.787579	chr22	18913049	18936254	0
OAZ2	1.46926e-05	0.732258	chr15	64990942	64995475	0
EIF6	0.000174047	0.716644	chr20	33847600	33865609	7010
GPRC5B	0.000102409	0.644281	chr16	19869536	19874100	22051
KCTD10	9.3922e-05	0.642682	chr12	109894767	109900569	14586
JMJD1C	2.01427e-06	0.619761	chr10	65024509	65029727	0
PCBP1	0.0005759	0.587189	chr2	70310897	70317294	0
CRISPLD1	1.50719e-05	-0.711081	chr8	76127652	76136632	230945
PCBP1-AS1	0.000351056	-0.7166	chr2	70310897	70317294	0
SPTLC3	0.000334655	-0.729031	chr20	12728583	12743237	246389
TBL1XR1	8.02242e-09	-0.882414	chr3	176036629	176047755	867293
PCDH11X	1.28662e-07	-1.22892	chrX	91353867	91368064	263408
EFNA5	1.66304e-06	-1.24736	chr5	106311634	106322065	684531
SEMA3E	4.04565e-08	-2.91386	chr7	83075053	83095321	183158

## Sheet: hESC_ChIPseq_peak_overlap_stats
TF name	Overlap with all peaks	Overlap with lower accessibility peaks	Lower accessibility peak overlap pval	Overlap with higher accessibility peaks	Higher accessibility peak overlap pval	# hESC ChIP peaks overlapped	Total hESC ChIP peaks	% hESC ChIPseq peaks
Pou5f1	2199	75	1	565	5.25572e-125	570	3973	0.143468
Nanog	3747	386	1	572	6.66586e-40	587	5450	0.107706
Bcl11	1902	222	0.999998	341	2.10731e-37	345	2494	0.138332
SOX2	10328	1434	0.999995	1224	1.18861e-29	1288	17968	0.071683
Ctcf	29566	198	1	2646	0.115262
Rad21	28018	280	1	2494	0.208842
Tcf12	5932	380	1	523	0.458351
Hdac2	4945	164	1	432	0.54194
P300	7458	252	1	648	0.616652
Rad21	34063	618	1	2968	0.733467
Cjun	1583	60	1	128	0.829553
Rxra	1071	46	1	84	0.852769
Ctcf	27512	174	1	2348	0.963379
Sp1	11976	377	1	990	0.985013
Mafk	2930	276	1	223	0.989165
Atf2	5016	109	1	396	0.989472
Cebpb	5136	298	1	391	0.999026
Tead4	12213	864	1	982	0.99922
Cmyc	288	12	1	5	1
Suz12	1664	9	1	88	1
Rfx5	1088	41	1	46	1
Chd1	5080	15	1	198	1
Ezh	3050	10	1	117	1
Jarid1	1495	0	1	5	1
Rbbp5	12371	177	1	277	1
Atf3	4065	38	1	169	1
Egr1	7359	86	1	238	1
Fosl1	879	4	1	19	1
Gabp	5307	13	1	126	1
Jund	6585	183	1	313	1
Nrsf	4595	224	1	142	1
Pol2	11825	130	1	482	1
Pol2	12571	64	1	467	1
Sin3	7451	103	1	200	1
Six5	2698	34	1	111	1
Sp2	2188	5	1	63	1
Sp4	5140	14	1	119	1
Srf	2822	90	1	134	1
Taf1	14483	99	1	373	1
Taf7	8307	32	1	204	1
Usf1	11288	587	1	674	1
Yy1	13595	289	1	740	1
Bach1	7297	216	1	231	1
Brca1	1855	9	1	36	1
Chd1	1769	4	1	61	1
Chd2	6204	47	1	228	1
Cmyc	4043	26	1	116	1
Ctbp	5923	148	1	260	1
Gtf2f1	3244	3	1	89	1
Jund	6472	243	1	355	1
MaxUcd	8393	266	1	503	1
Mxi1	5671	64	1	120	1
Nrf1	4164	2	1	42	1
Sin3	16247	253	1	457	1
Tbp	13581	91	1	424	1
Usf2	4987	108	1	270	1
Znf143	22349	105	1	1463	1
Pol2	9341	19	1	255	1
