# Supplementary material for: Tumor suppressor SMARCB1 suppresses super-enhancers to govern hESC lineage determination
Source: eLife journal article supplement (doi:10.7554/elife.45672), 2019-04-29
Supplement: supp [file elife-45672-supp-v1.zip › elife_poa_e45672_Supplementary_File_6.xlsx]

## Sheet: Sheet1
Needed primers
18S_F	GTAACCCGTTGAACCCCATT
18S_R	CCATCCAATCGGTAGTAGCG
BRACHYURY_F	GGGTCCACAGCGCATGAT
BRACHYURY_R	TGATAAGCAGTCACCGCTATGAA
BRN2_F	GCGGATCAAACTGGGATTTAC
BRN2_R	GCACATGTTCTTGAAGCTCAG
CDH2_F	CTTTCAAACACAGCCACGG
CDH2_R	GGTTGATCCTTATCGGTCACAG
CXCR4_F	GTGGGCGGGGCAGAGGAGTTA
CXCR4_R	AGAACAAAAGGGCACTGAGACGC
EOMES_F	CTGGCTTCCGTGCCCACGTC
EOMES_R	CATGCGCCTGCCCTGTTTCG
FOXF1_F	GCAGCCTCTCCACGCACTCC
FOXF1_R	CACATGCTGGGCGACTGCGA
GAPDH_F	AATGAAGGGGTCATTGATGG
GAPDH_R	AAGGTGAAGGTCGGAGTCAA
GOOSECOID_F	CGCGAGGAGAAAGTGGAGGTCTG
GOOSECOID_R	CCGCGTTCTCCGACTCCTCTGA
HAND1_F	GATGGCGGCCGTGAGAGCAA
HAND1_R	GCCAGCCGGTGCGTCCTTTA
MUSASHI1_F	GACTCAGTTGGCAGACTACG
MUSASHI1_R	CATCACCAGACACTCCTTCAC
NANOG_F	ATGGAGGAGGGAAGAGGAGA
NANOG_R	GATTTGTGGGCCTGAAGAAA
NESTIN_F	AGCCTGGAGGTGGCCACGTA
NESTIN_R	CACCGCCAGGTGTTTGCAGC
PAX6_F	GCCCCATATTCGAGCCCCGT
PAX6_R	TGGCCGCCCGTTGACAAAGA
POU5F1_F	TGCAGCAGATCAGCCACATC
POU5F1_R	TGGCGCCGGTTACAGAAC
SMARCB1_F	GGATGGCAACGATGAGAAGT
SMARCB1_R	TGTTGATGGTTGTGGAGCAT
SOX1_F	GGCTTTTGTACAGACGTTCCCACAT
SOX1_R	AGGGTCTCCGGGGAAGGTGAGT
SOX2_F	ATGATGGAGACGGAGCTGAAGCC
SOX2_R	CGCGGTCCGGGCTGTTTTT
