# Supplementary figures and images for: Tumor suppressor SMARCB1 suppresses super-enhancers to govern hESC lineage determination
Source: eLife journal article supplement (doi:10.7554/elife.45672), 2019-04-29

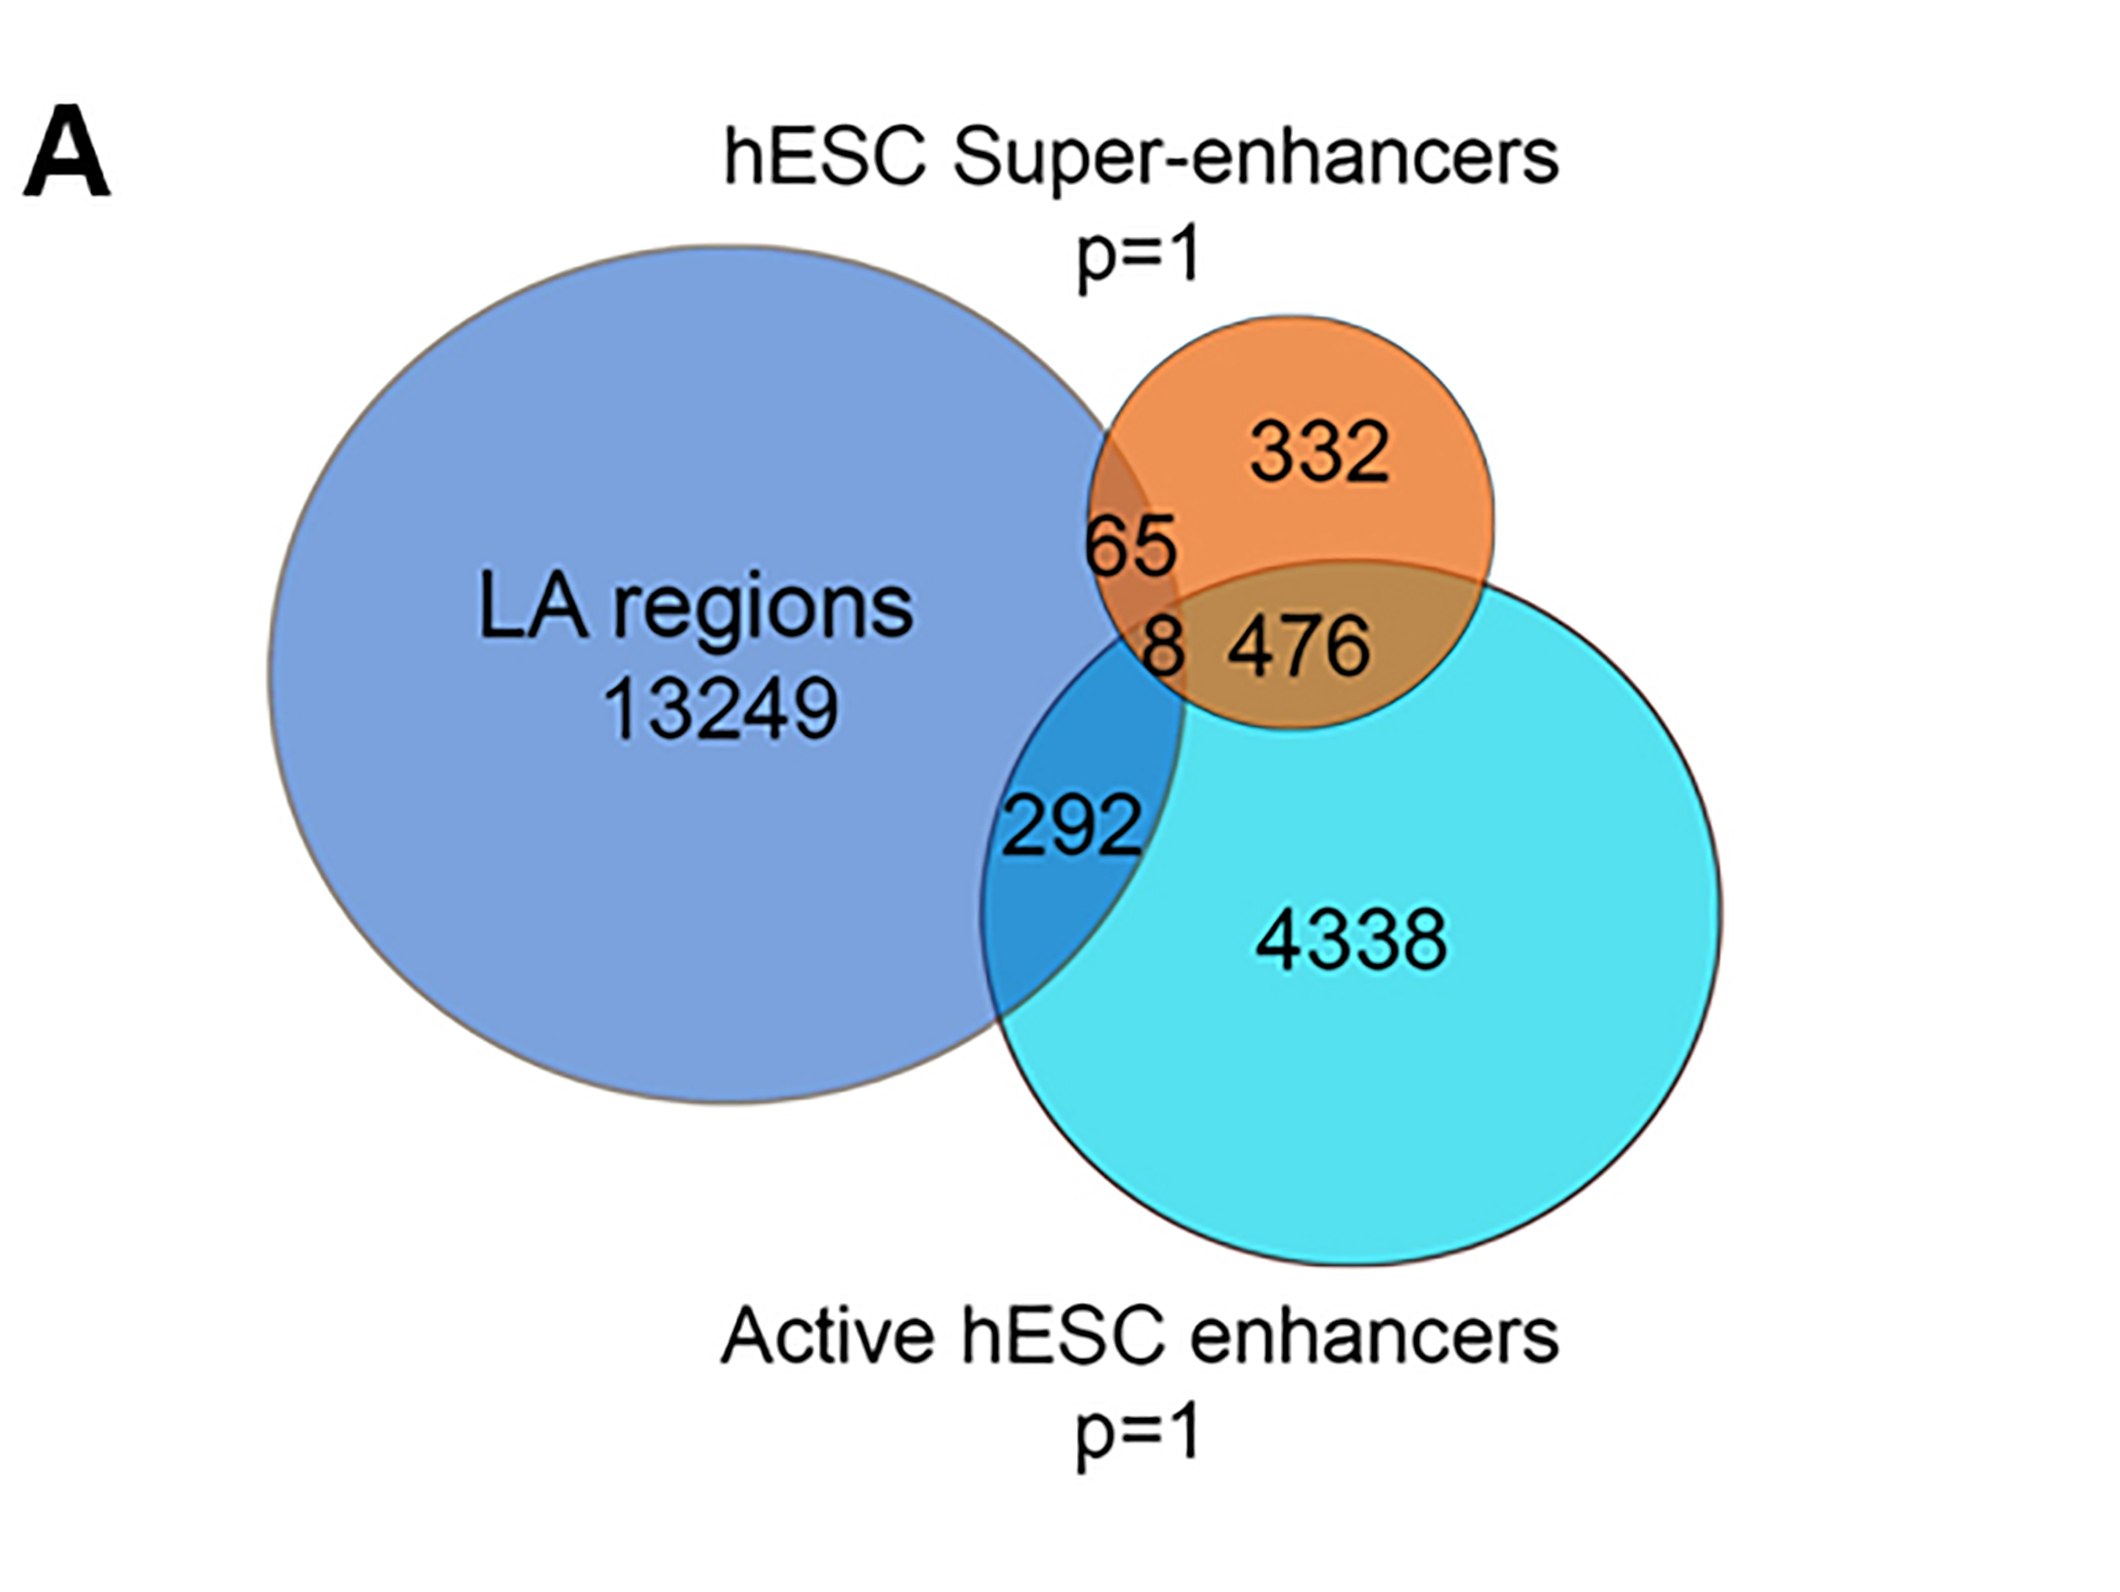

Supplement: supp [file elife-45672-supp-v1.zip › elife_poa_e45672_Figure_5_figure_supplement_1.jpg]

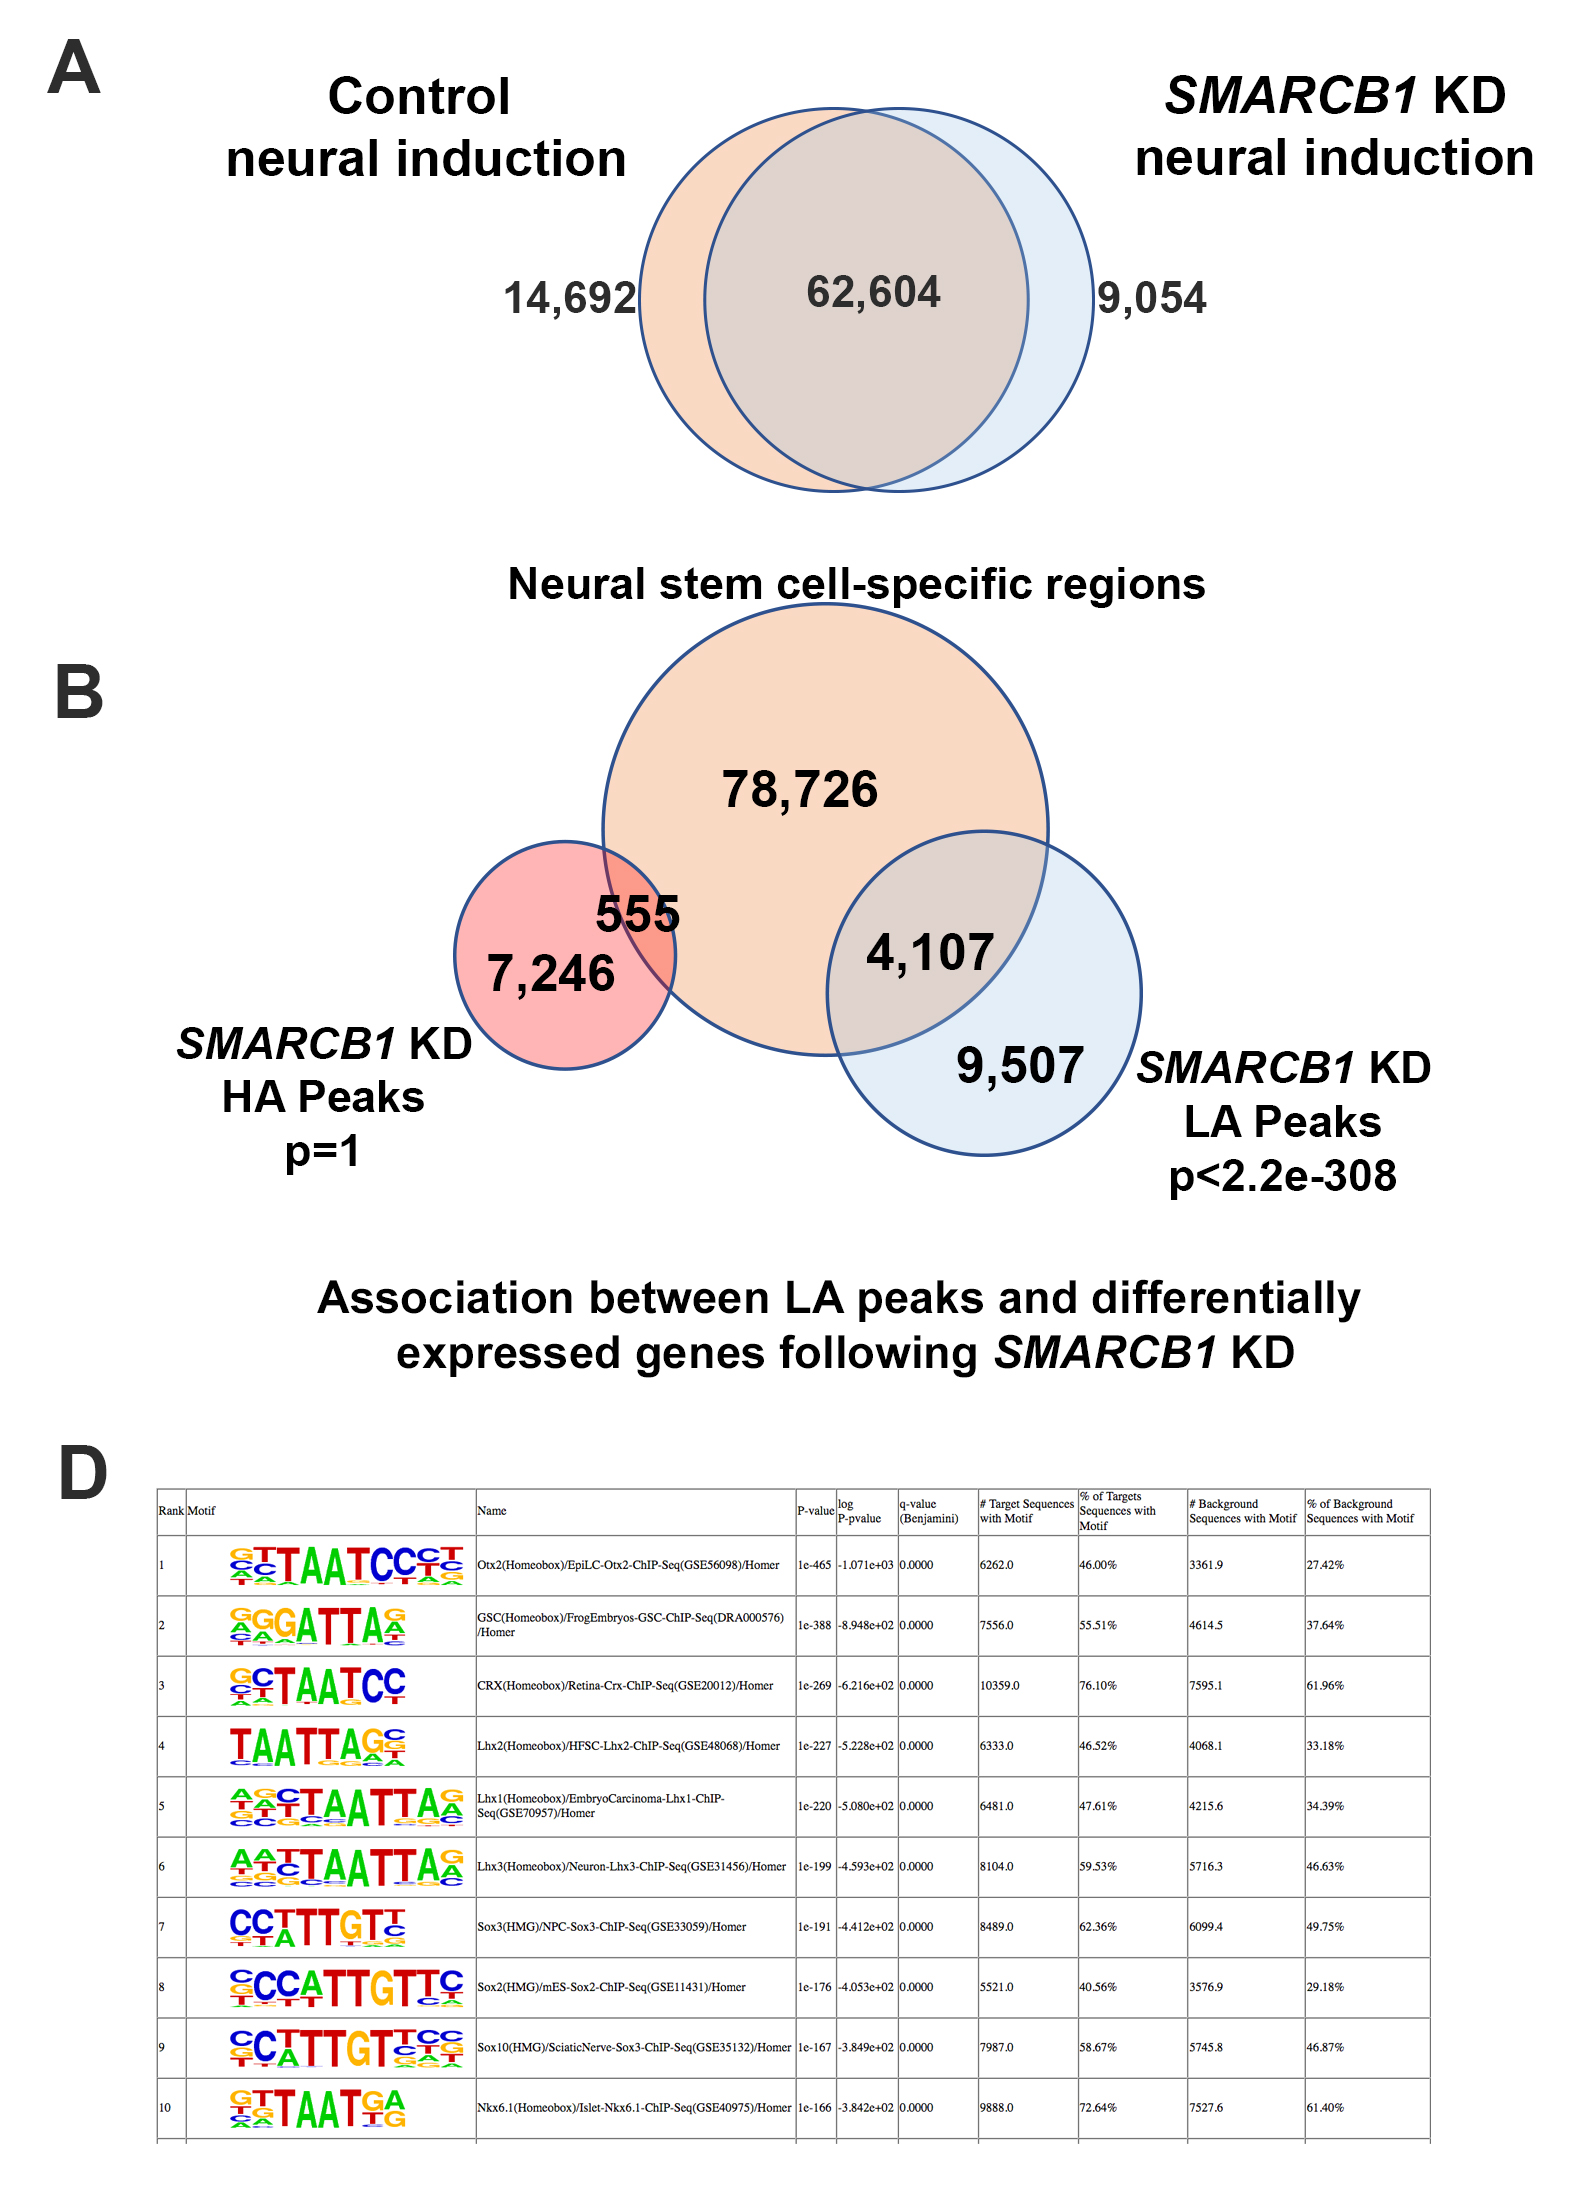

Supplement: supp [file elife-45672-supp-v1.zip › elife_poa_e45672_Figure_4_figure_supplement_1.jpg]

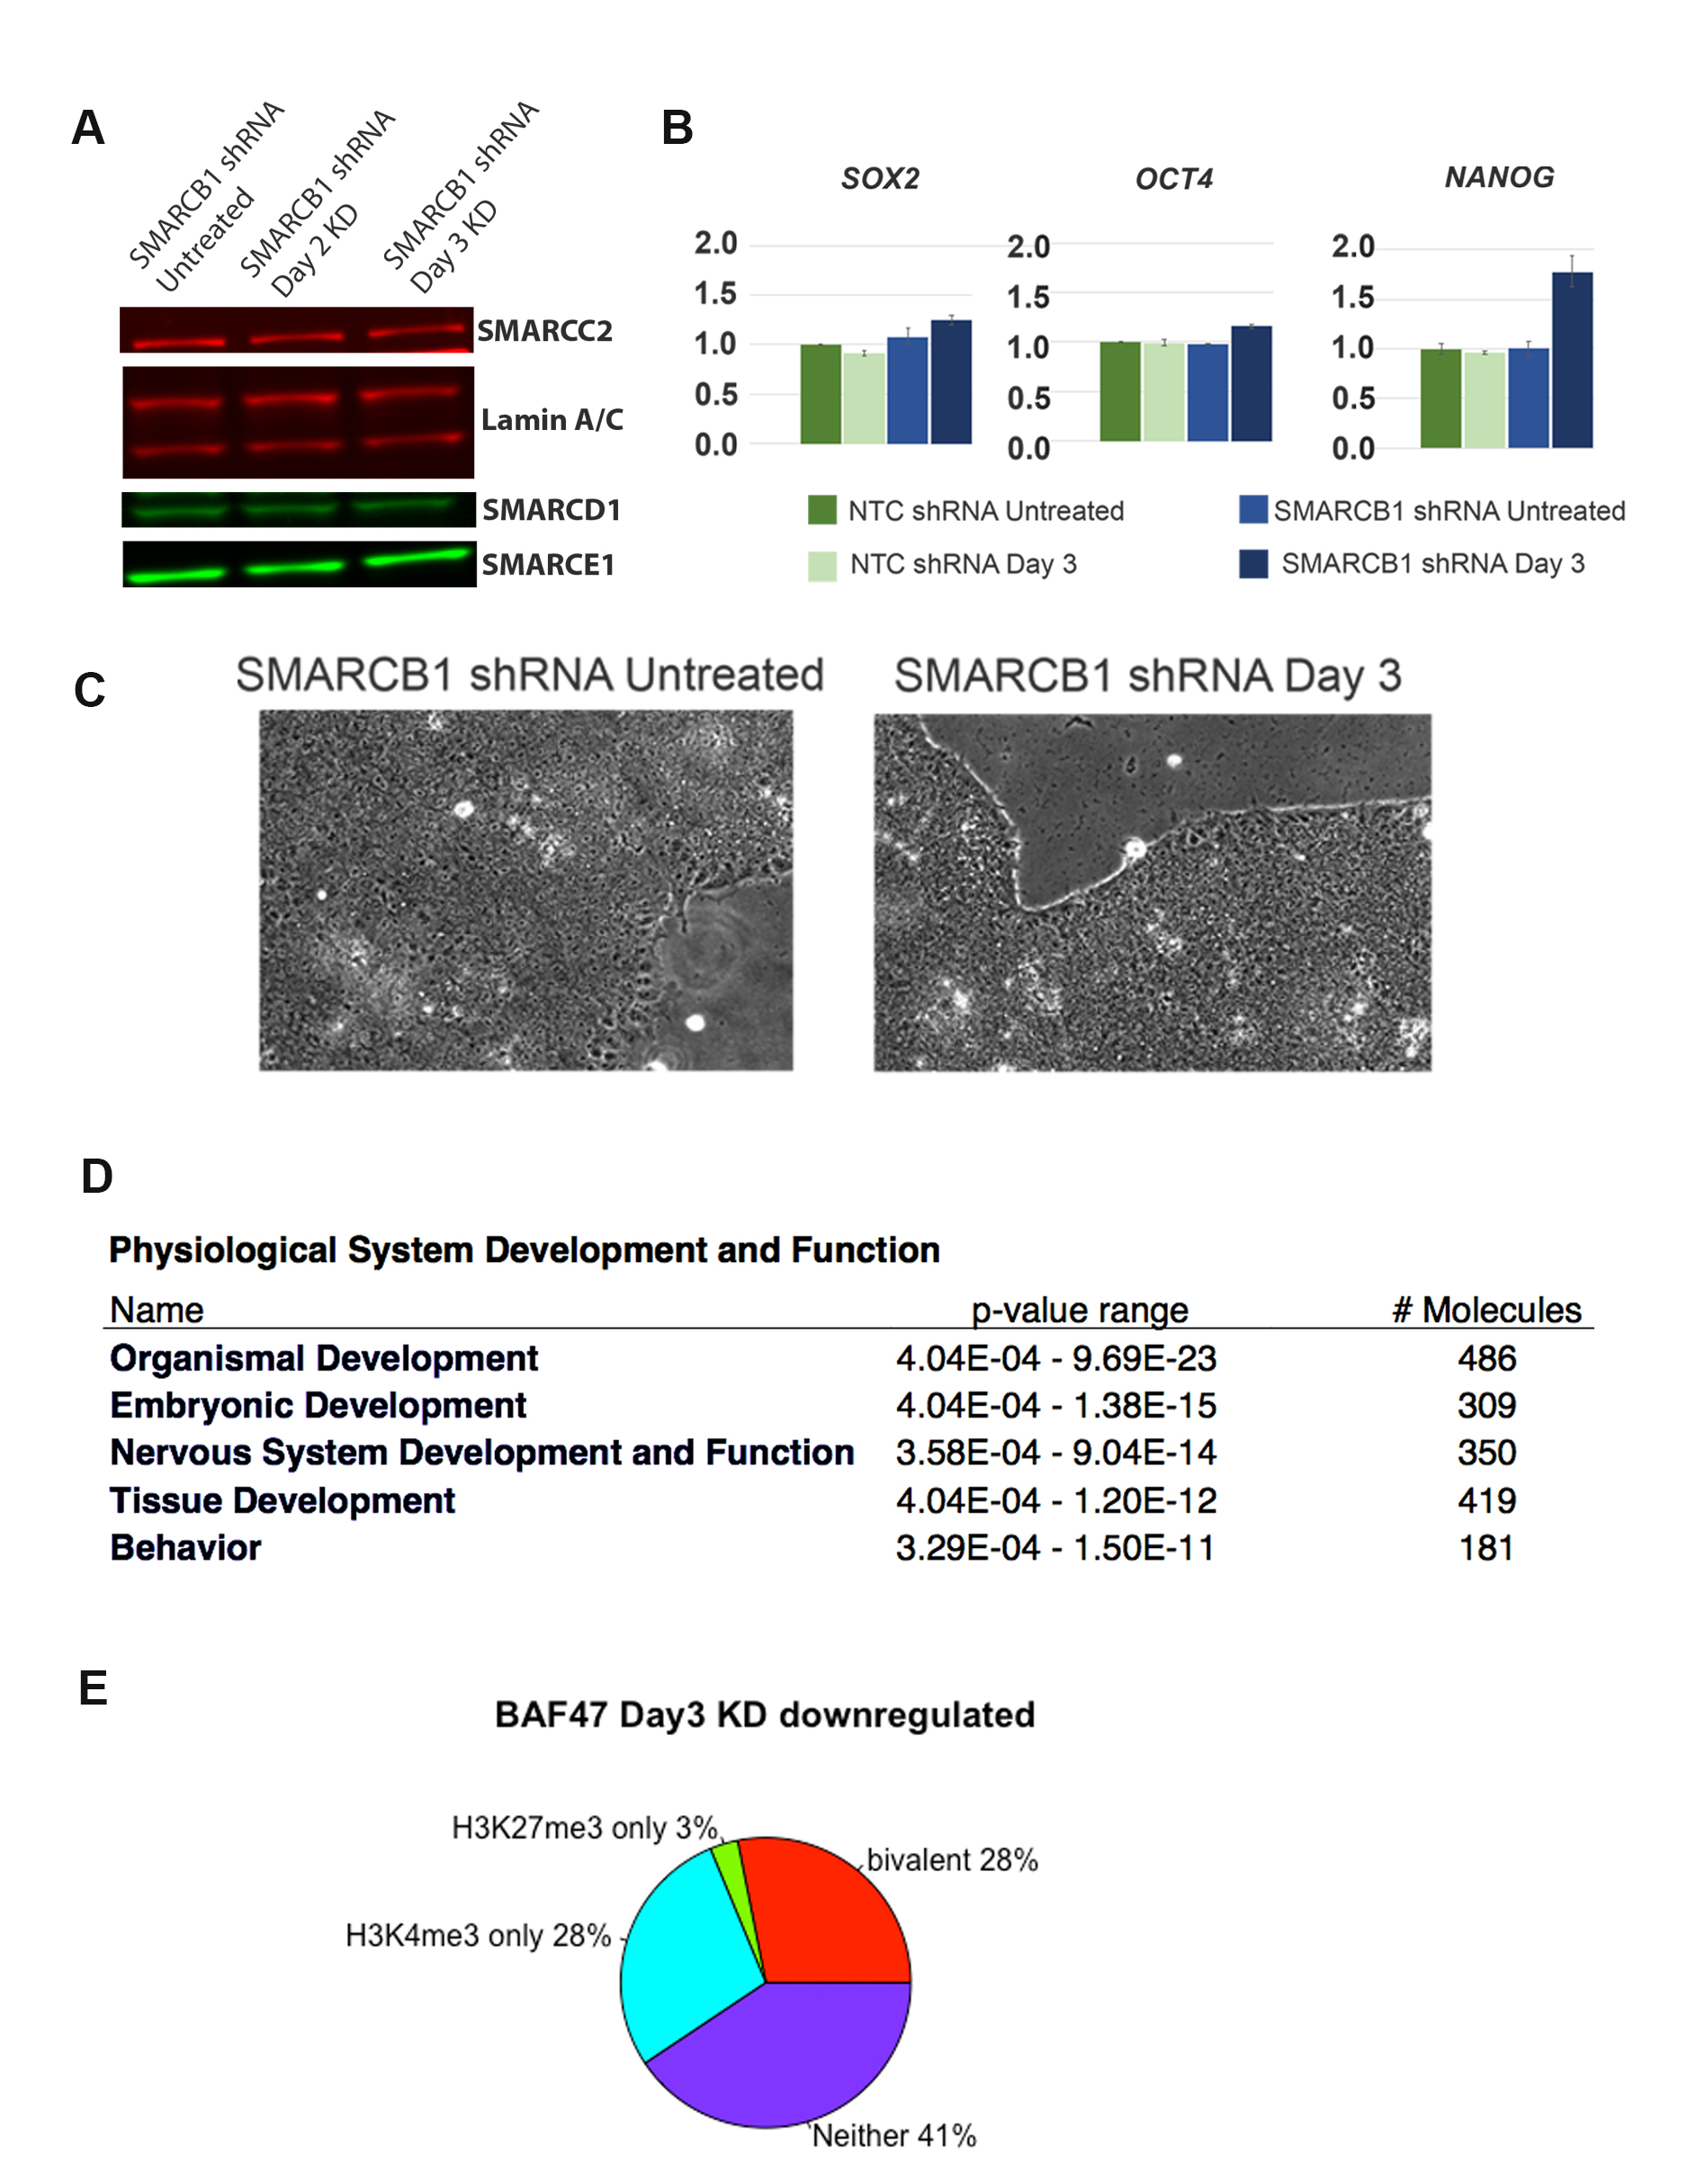

Supplement: supp [file elife-45672-supp-v1.zip › elife_poa_e45672_Figure_1_figure_supplement_1.jpg]

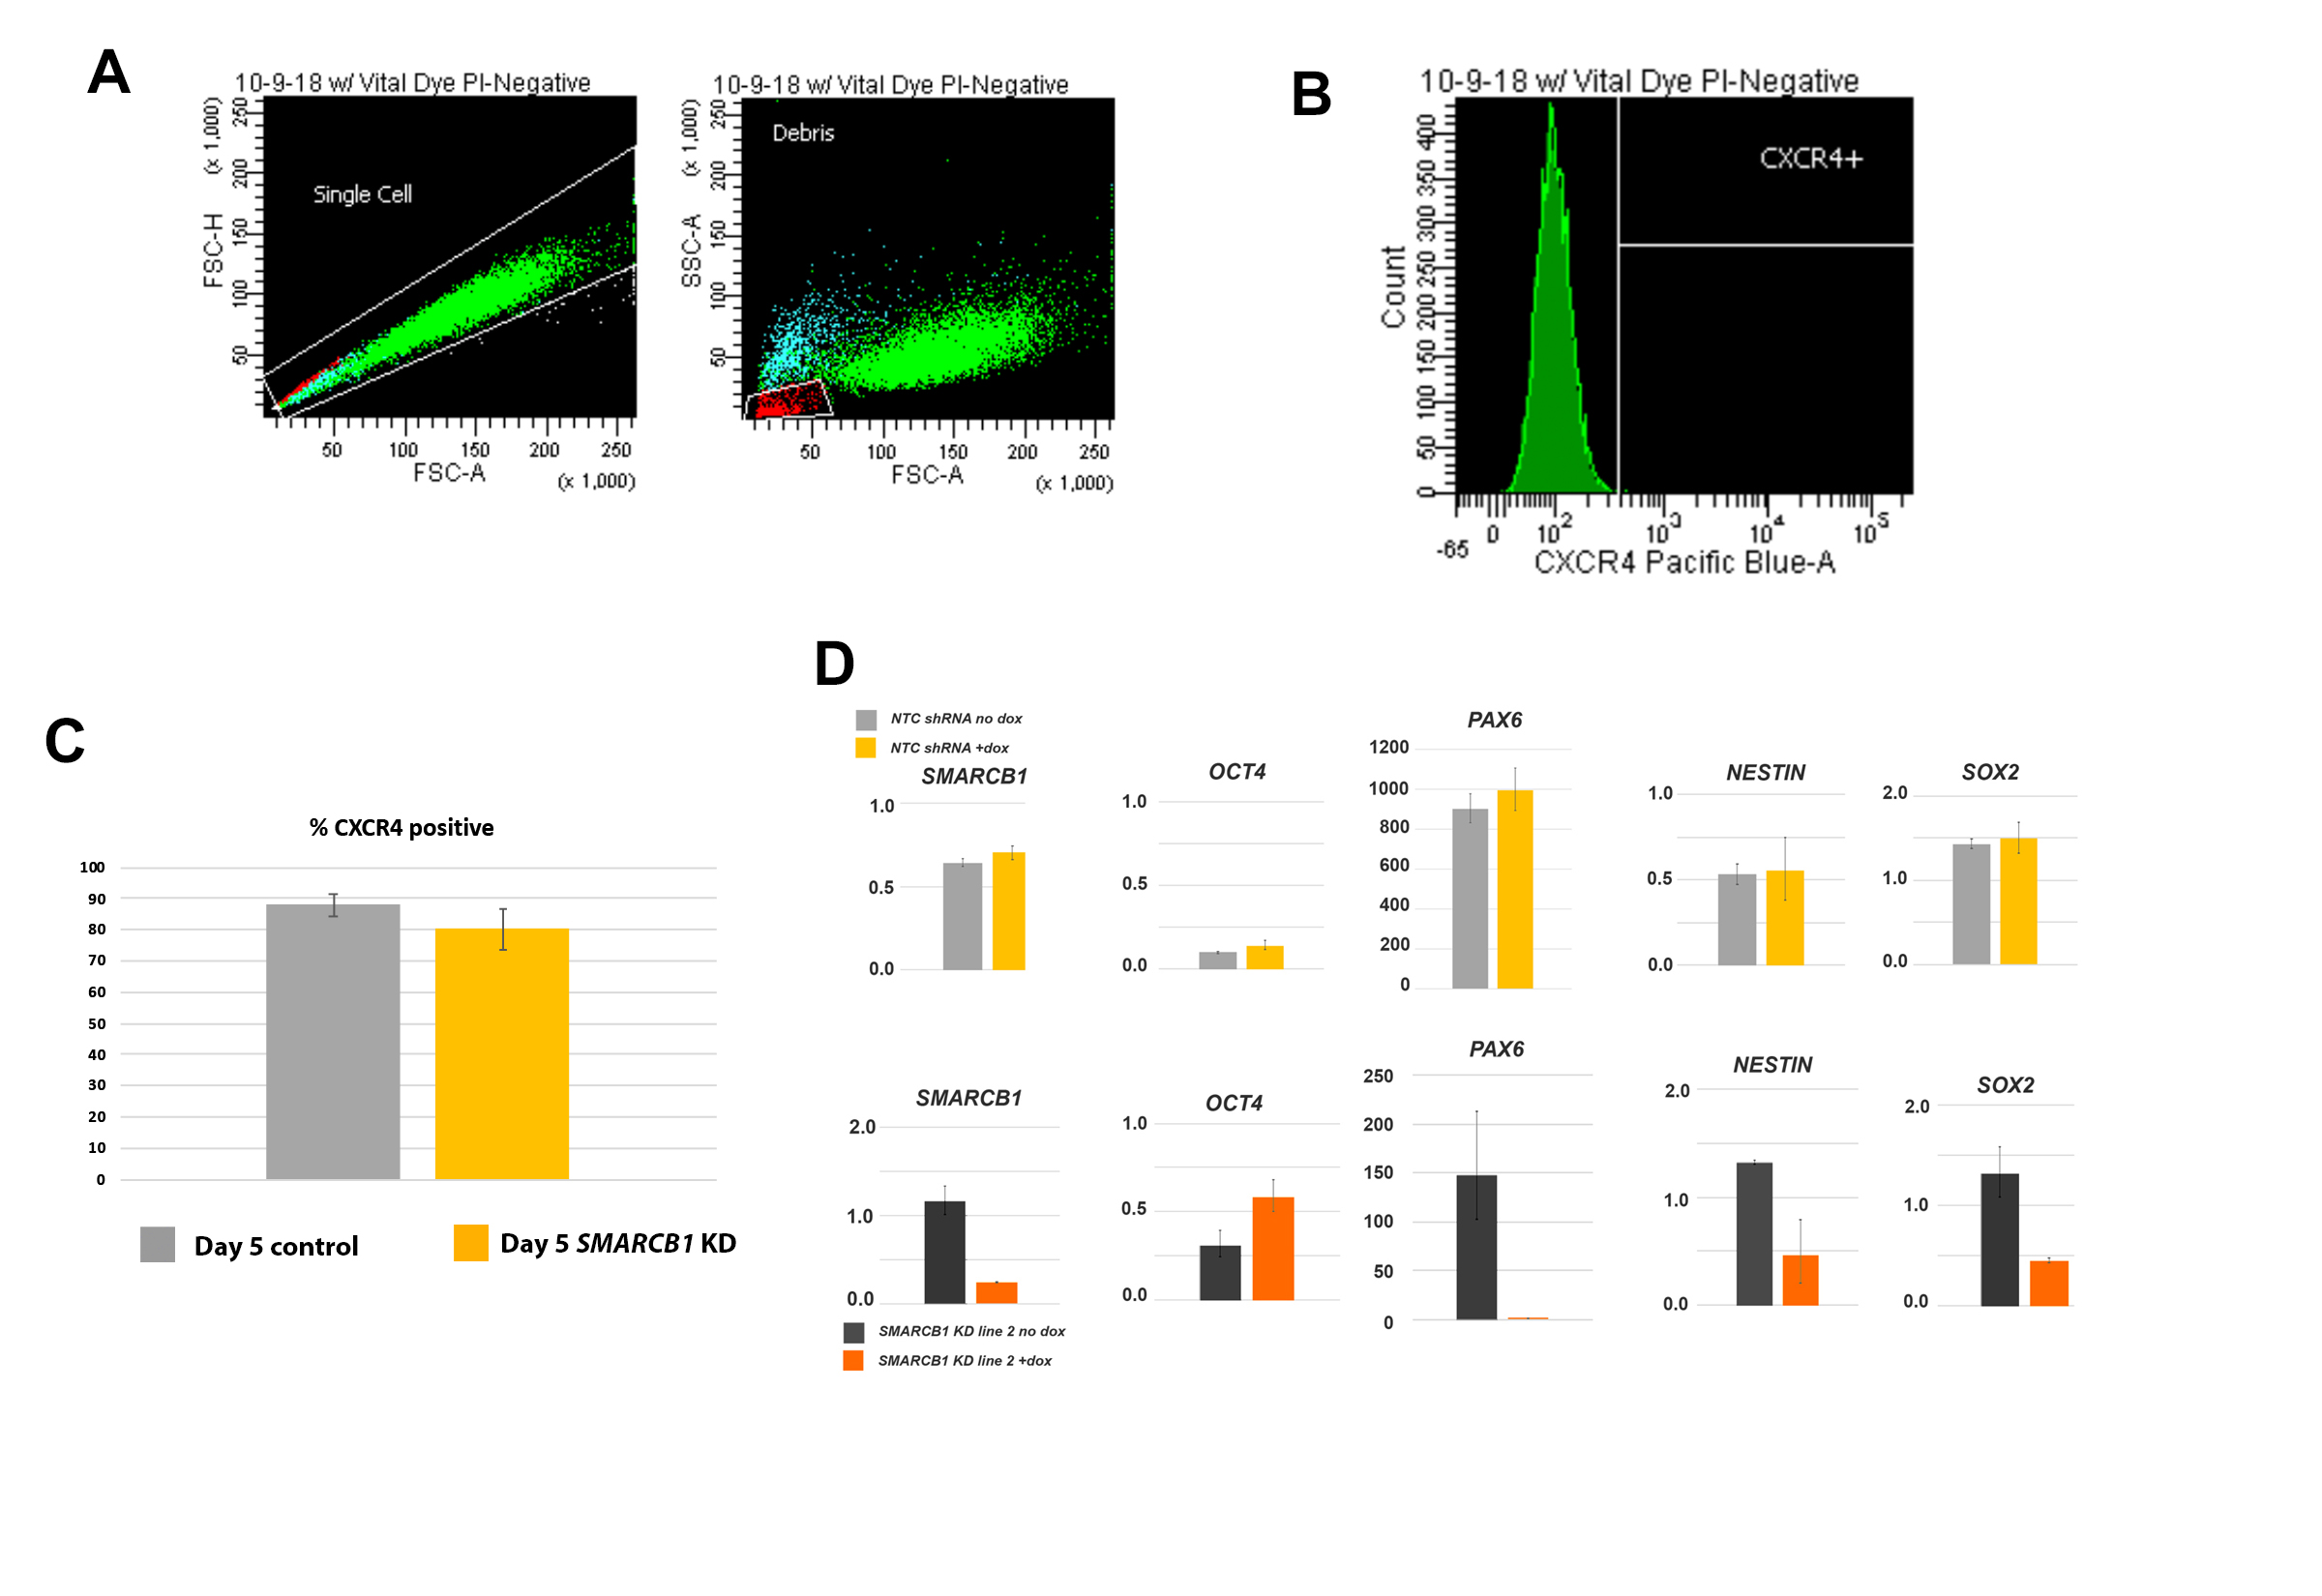

Supplement: supp [file elife-45672-supp-v1.zip › elife_poa_e45672_Figure_3_figure_supplement_1.jpg]

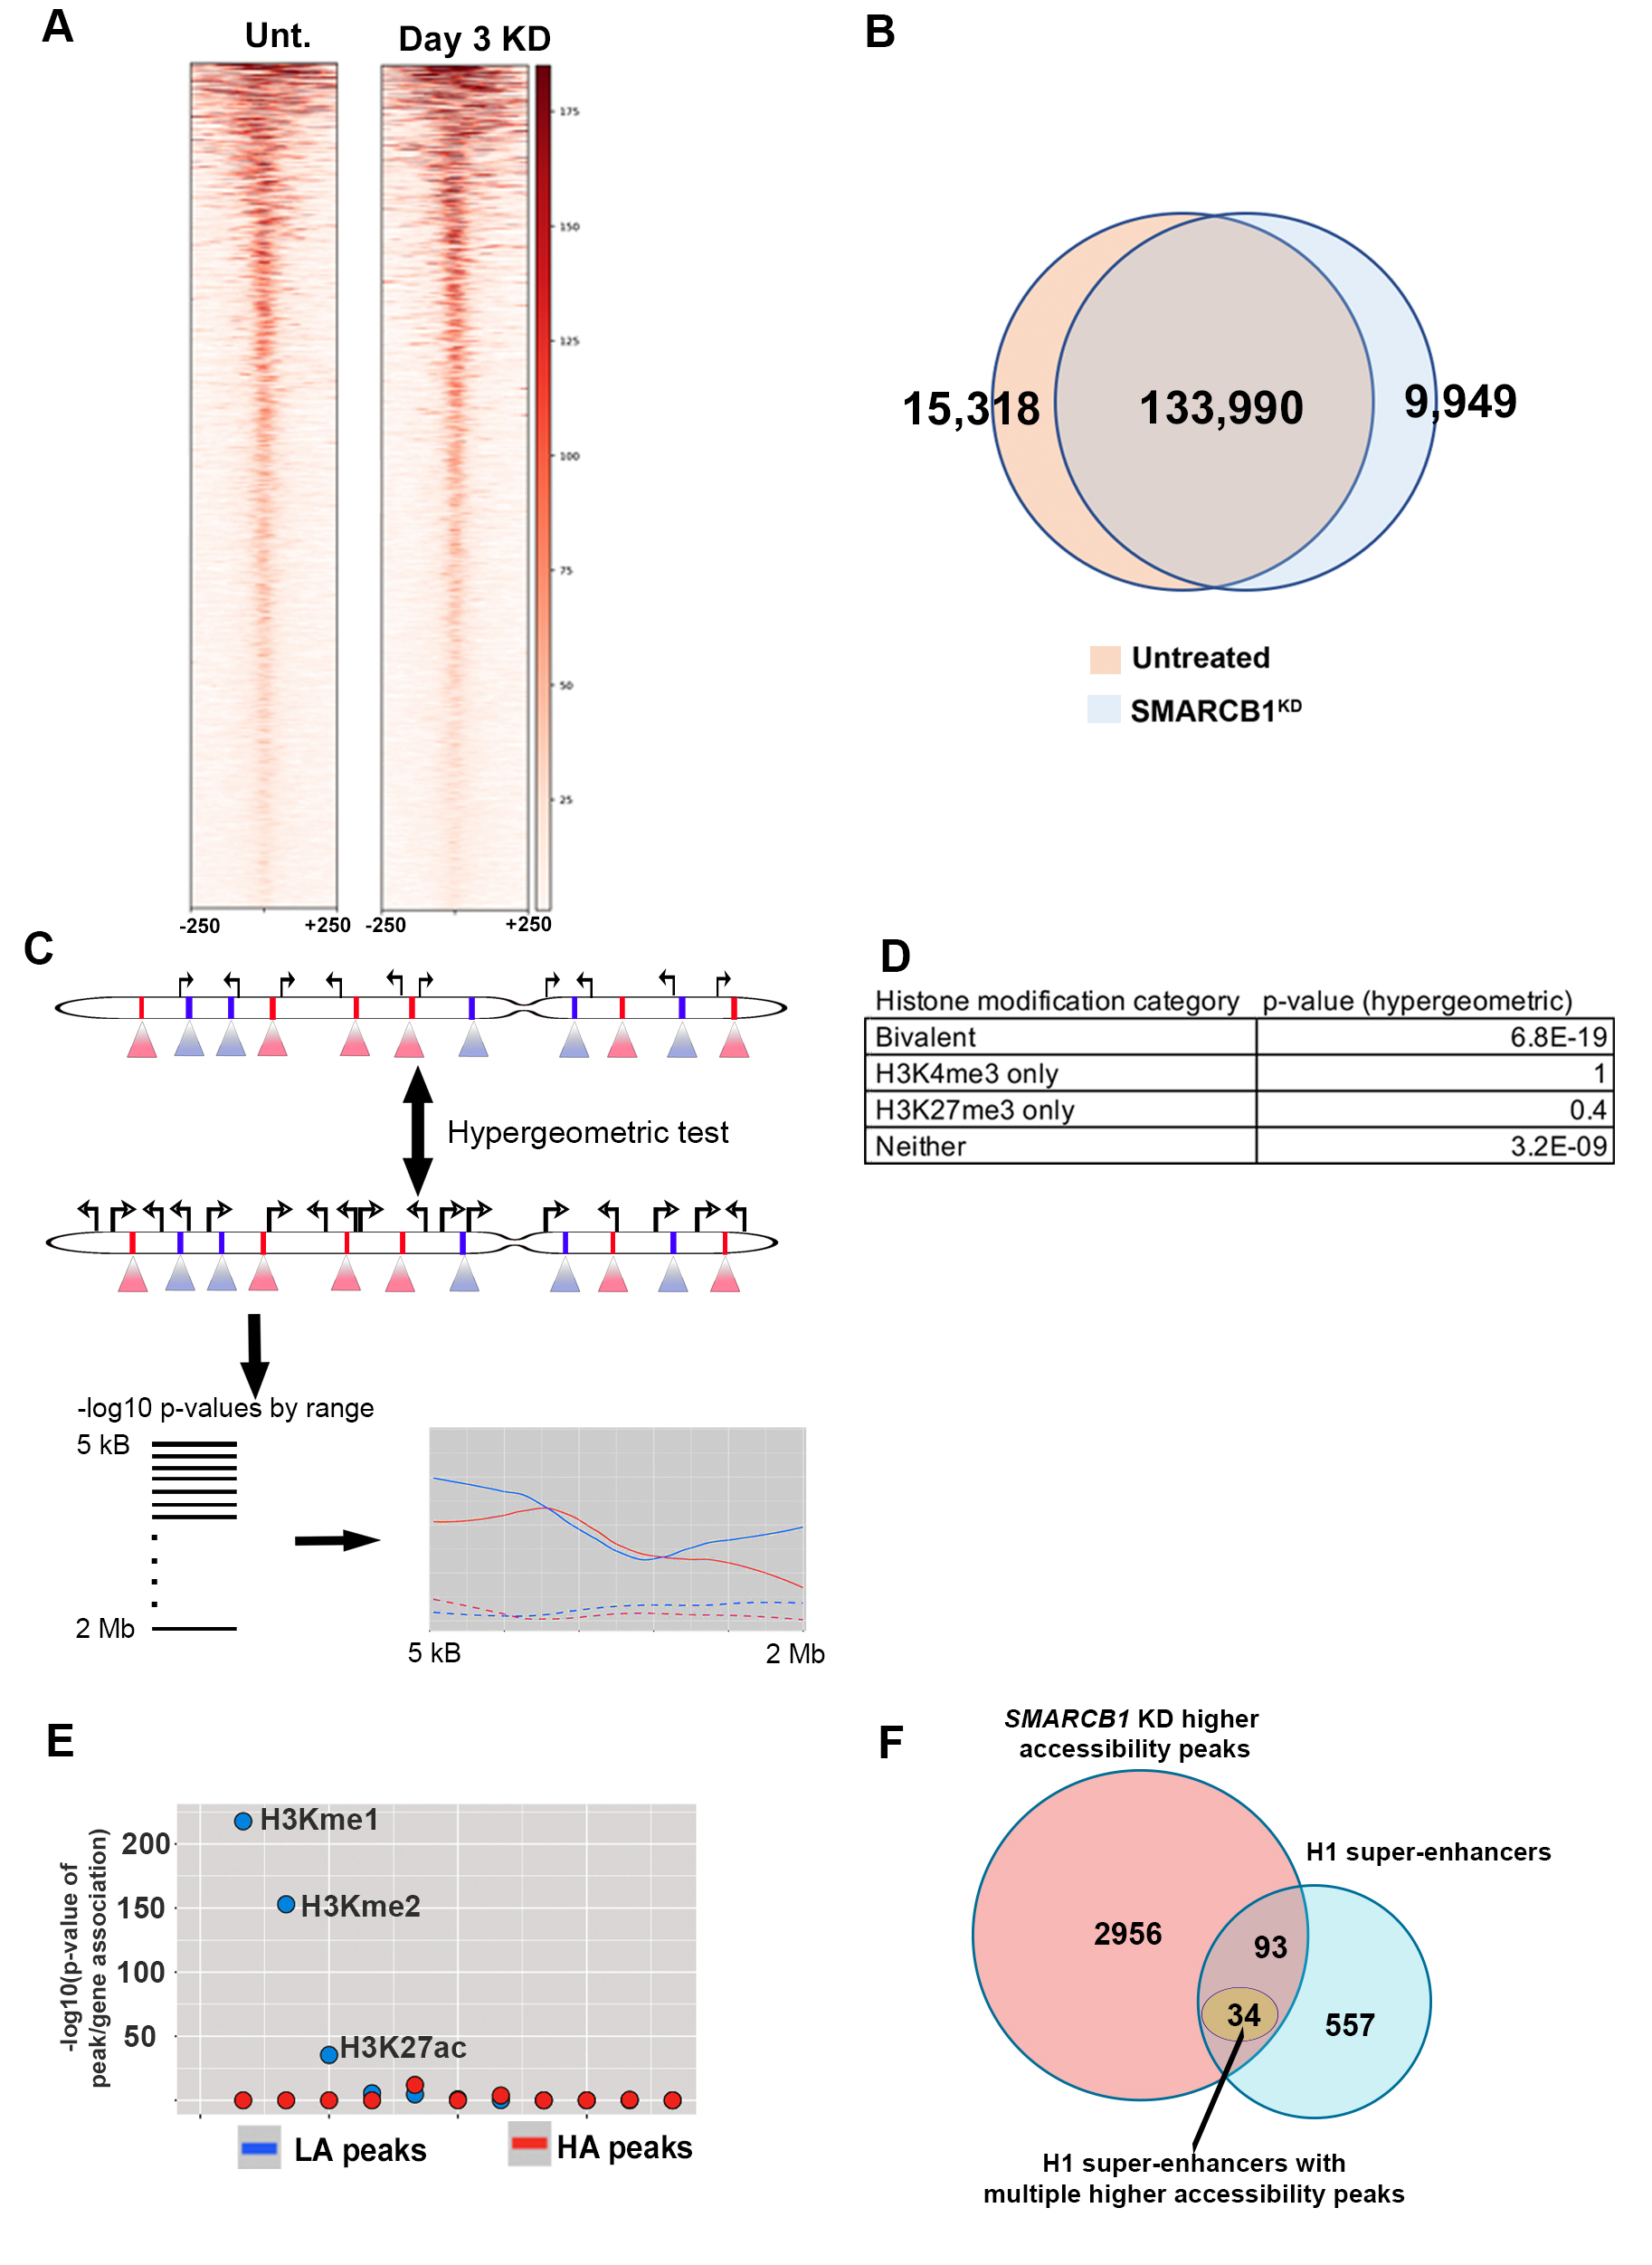

Supplement: supp [file elife-45672-supp-v1.zip › elife_poa_e45672_Figure_2_figure_supplement_1.jpg]
